# Supplementary material for: FeCl3·6H2O catalyzed aqueous media domino synthesis of 5-monoalkylbarbiturates: water as both reactant and solvent
Source: Royal Society of Chemistry journal article supplement (doi:10.1039/c4ra00093e), 2014-01-01

## Supporting Information

### **FeCl<sub>3</sub>·6H<sub>2</sub>O catalyzed aqueous media domino synthesis of 5-monoalkylbarbiturates: Water as both reactant and solvent**

**Subarna Jyoti Kalita, Hormi Mecadon\* and Dibakar Chandra Deka\***

Department of Chemistry, University of Gauhati, G.B. Nagar, Guwahati 781014, Assam,  
India

Emails: [hormimecadon@gmail.com](mailto:hormimecadon@gmail.com)/ [dcdeka@rediffmail.com](mailto:dcdeka@rediffmail.com)

|            | <b>Contents</b>                                                                                                                                    | <b>Page</b> |
|------------|----------------------------------------------------------------------------------------------------------------------------------------------------|-------------|
| <b>I</b>   | Supporting Information.....                                                                                                                        | 01          |
| <b>II</b>  | X-ray Structure of 5-(1-(2-chlorophenyl)-3-oxobutyl)-1,3-dimethylpyrimidine-2,4,6(1 <i>H</i> ,3 <i>H</i> ,5 <i>H</i> )-trione ( <b>4bb</b> ) ..... | 02          |
| <b>III</b> | <sup>1</sup> H NMR and <sup>13</sup> C NMR spectra of the products.....                                                                            | 03-35       |

II. X-ray structure of 5-(1-(2-chlorophenyl)-3-oxobutyl)-1,3-dimethylpyrimidine-2,4,6-(1*H*,3*H*,5*H*)-trione (4bb).

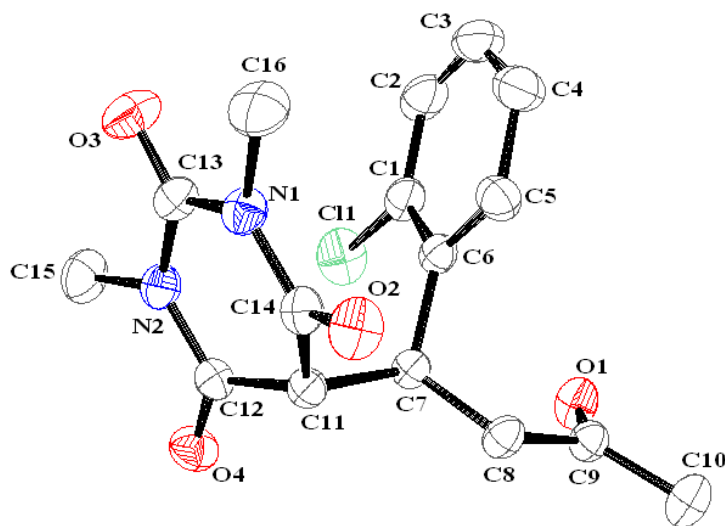

X-ray structure of **4bb** [CCDC 959094]. Hydrogen atoms omitted for clarity. This data can be obtained free of charge from The Cambridge Crystallographic Data Center *via* [www.ccdc.cam.ac.uk/data\\_request/cif](http://www.ccdc.cam.ac.uk/data_request/cif).

III.  $^1\text{H}$  NMR and  $^{13}\text{C}$  NMR Spectra of the Products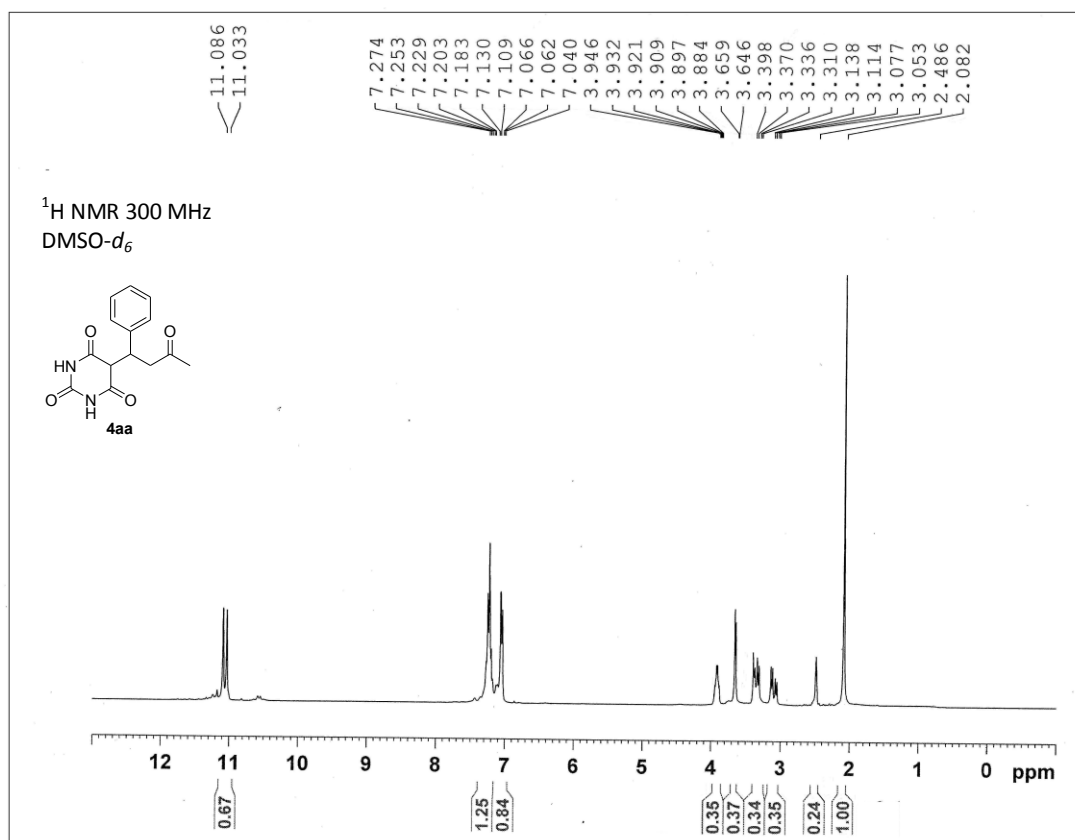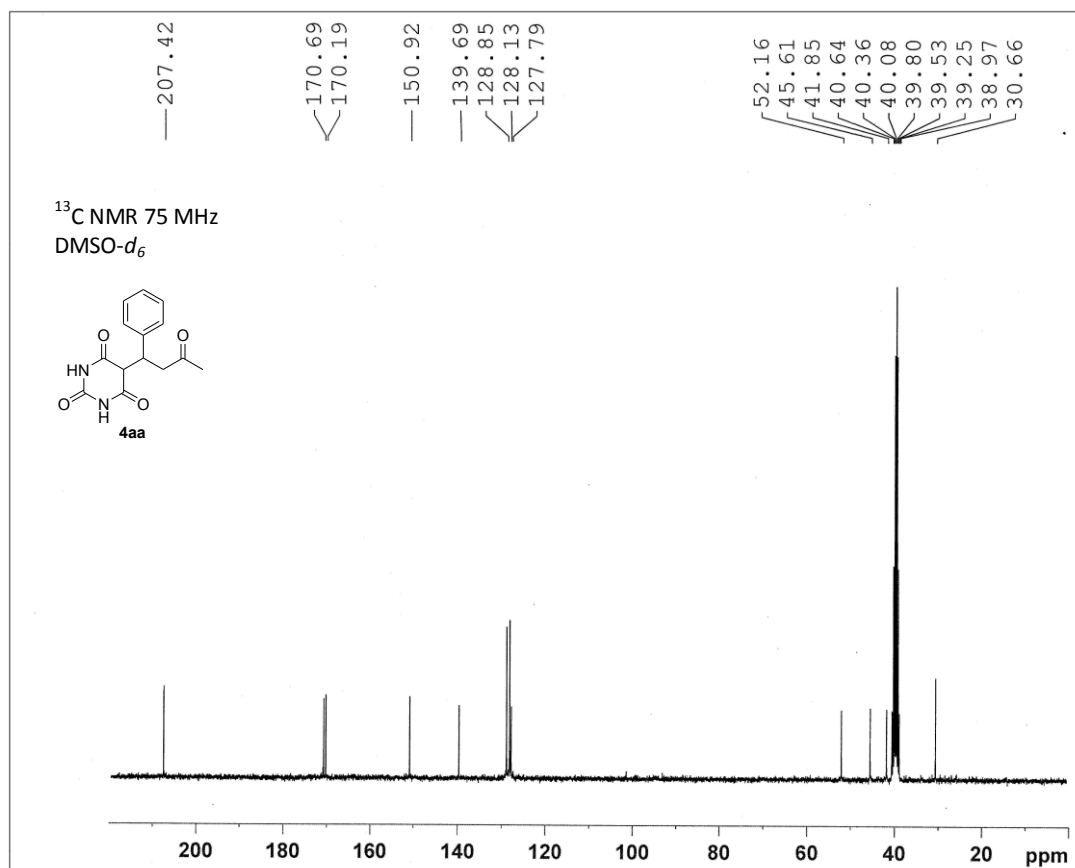

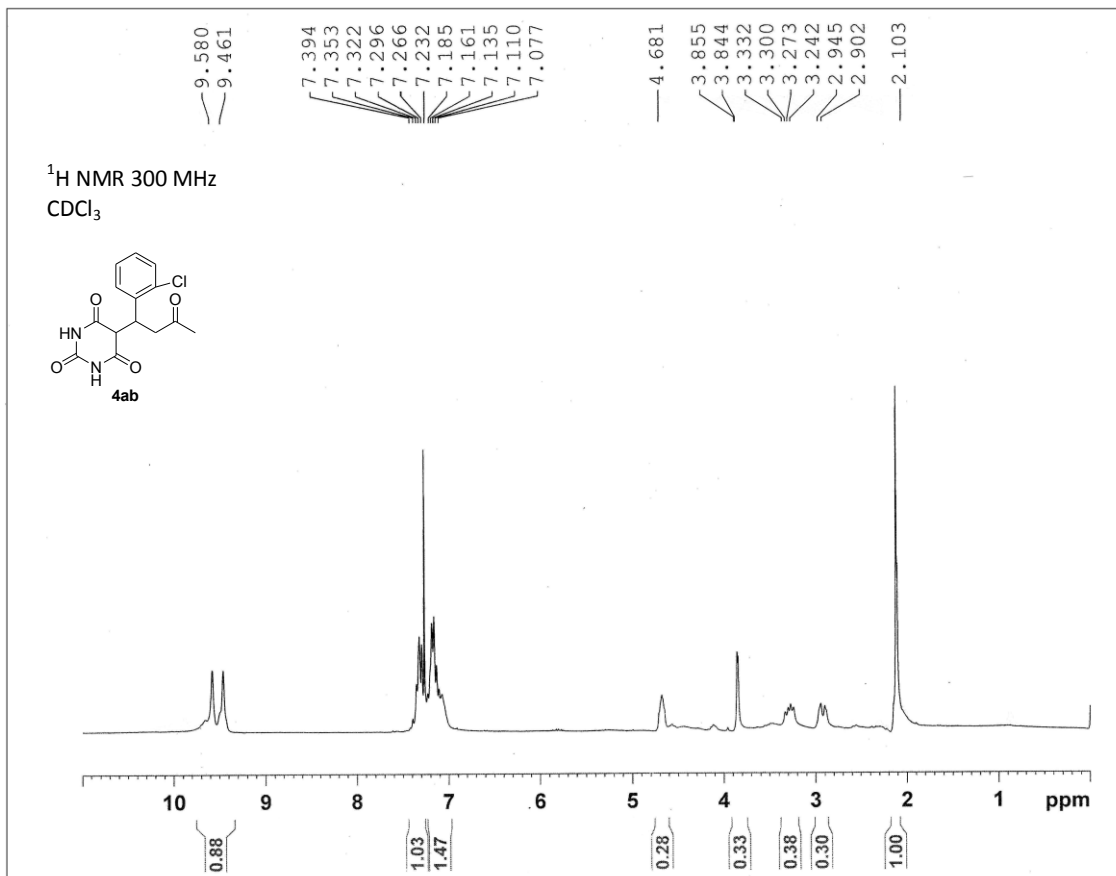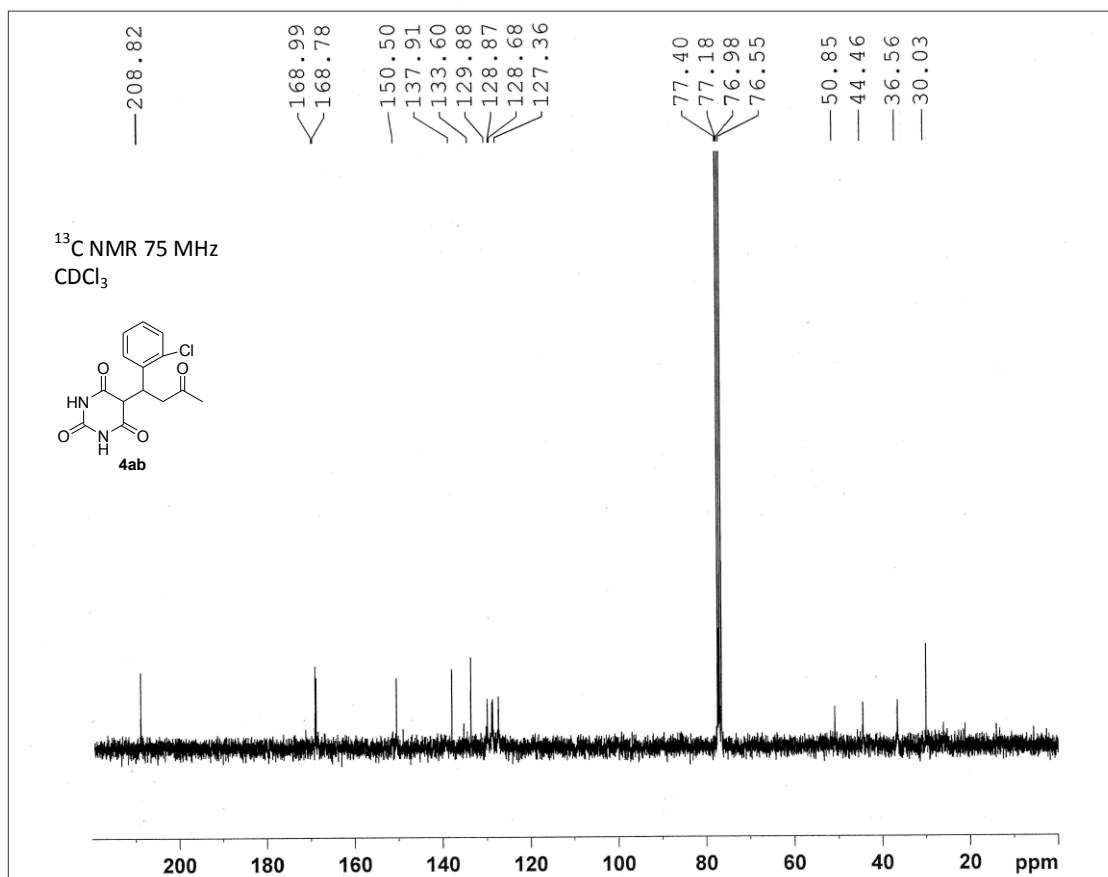

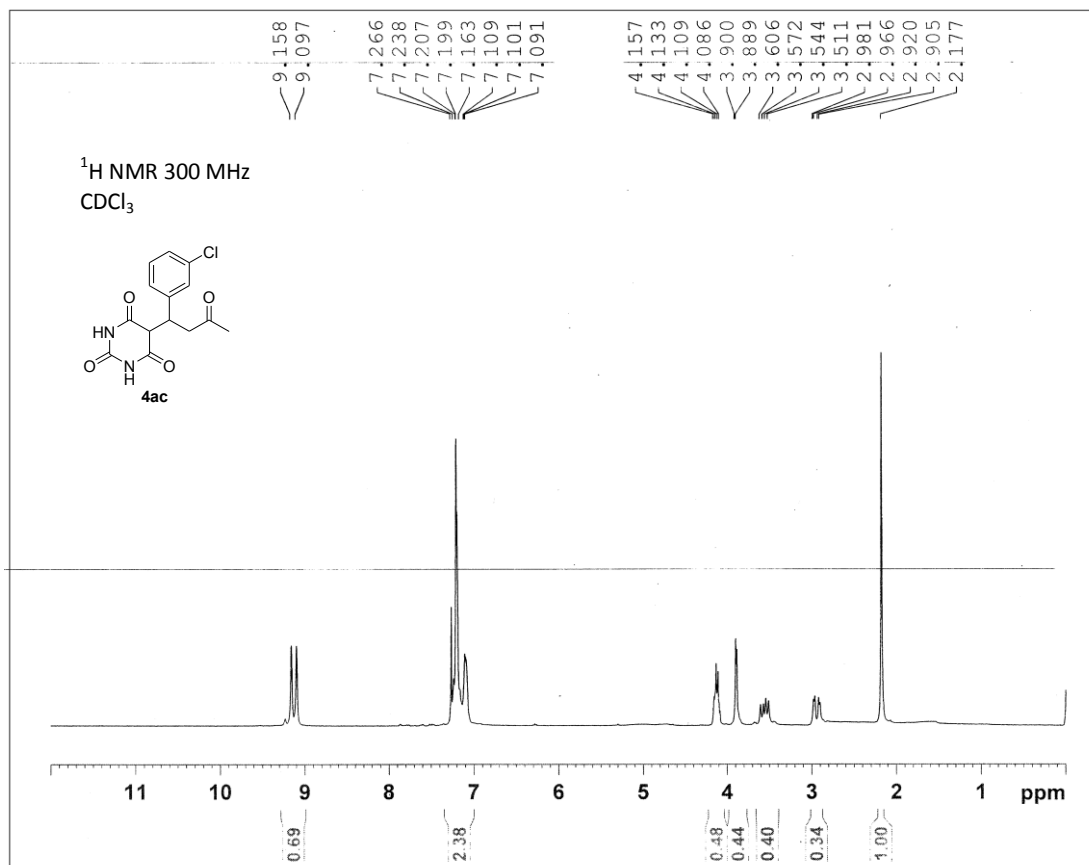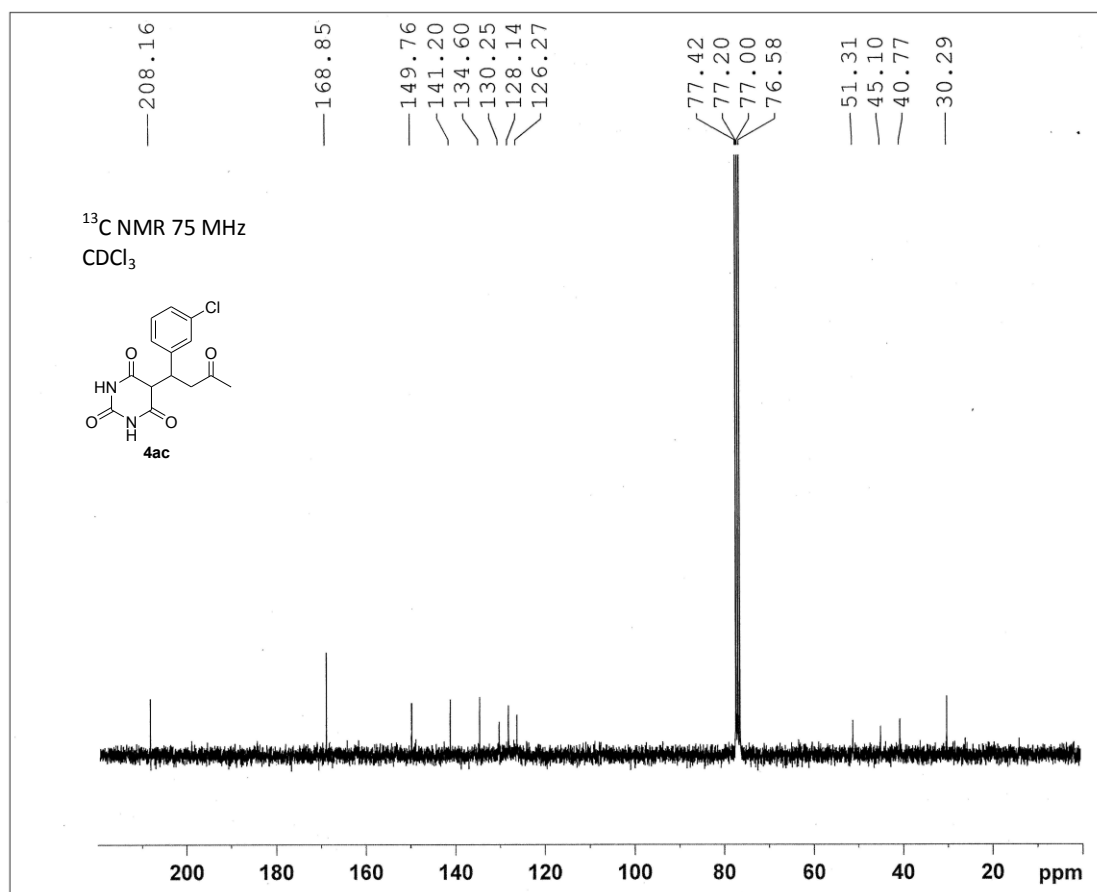

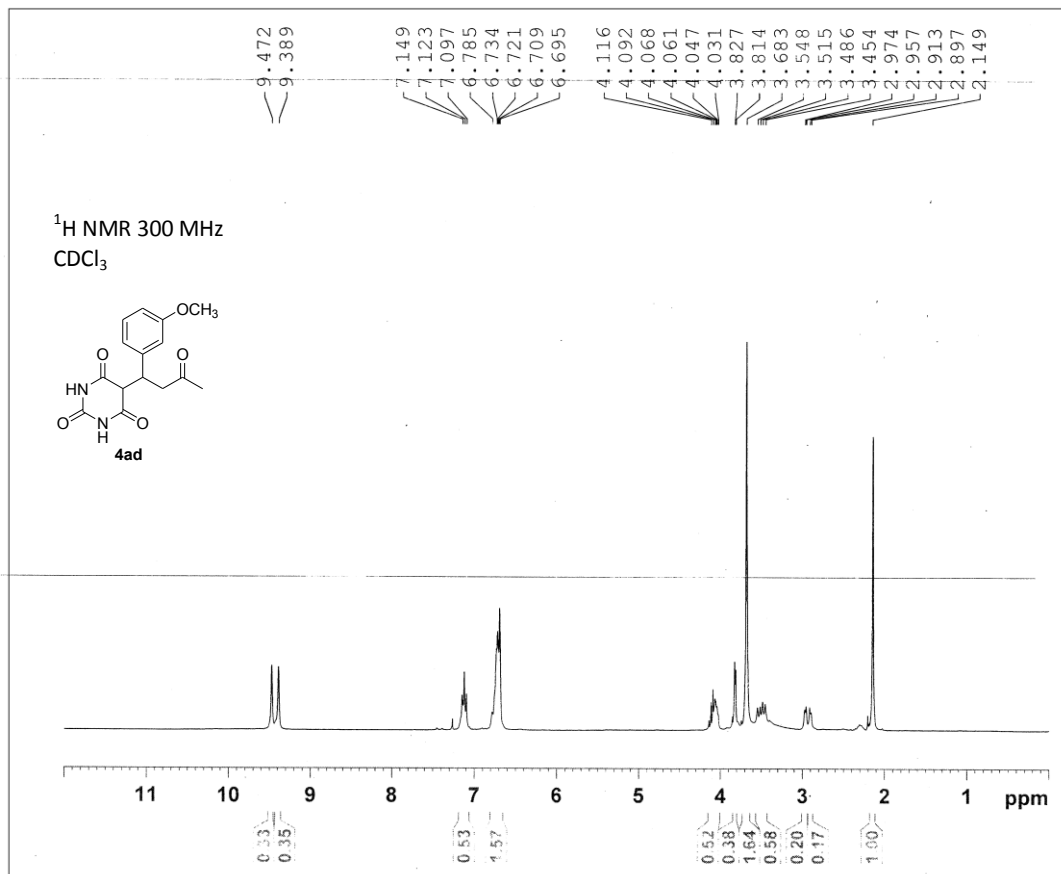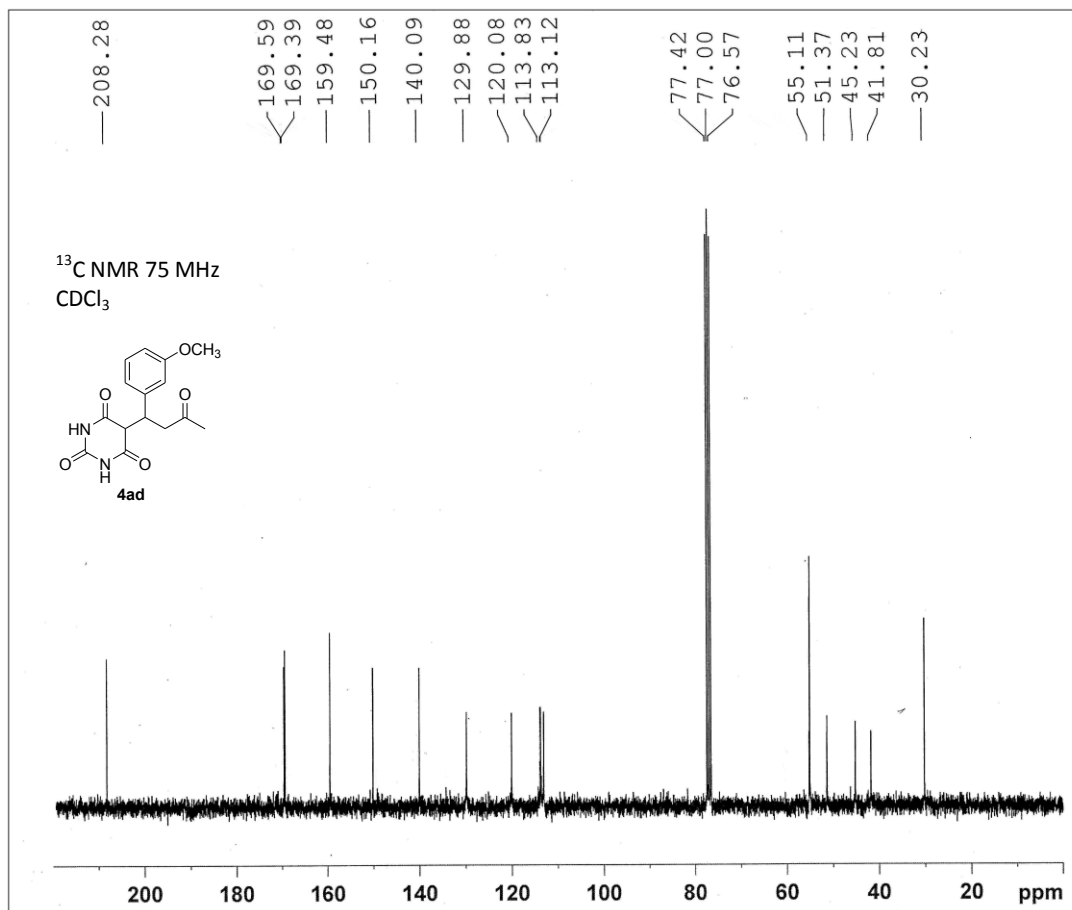

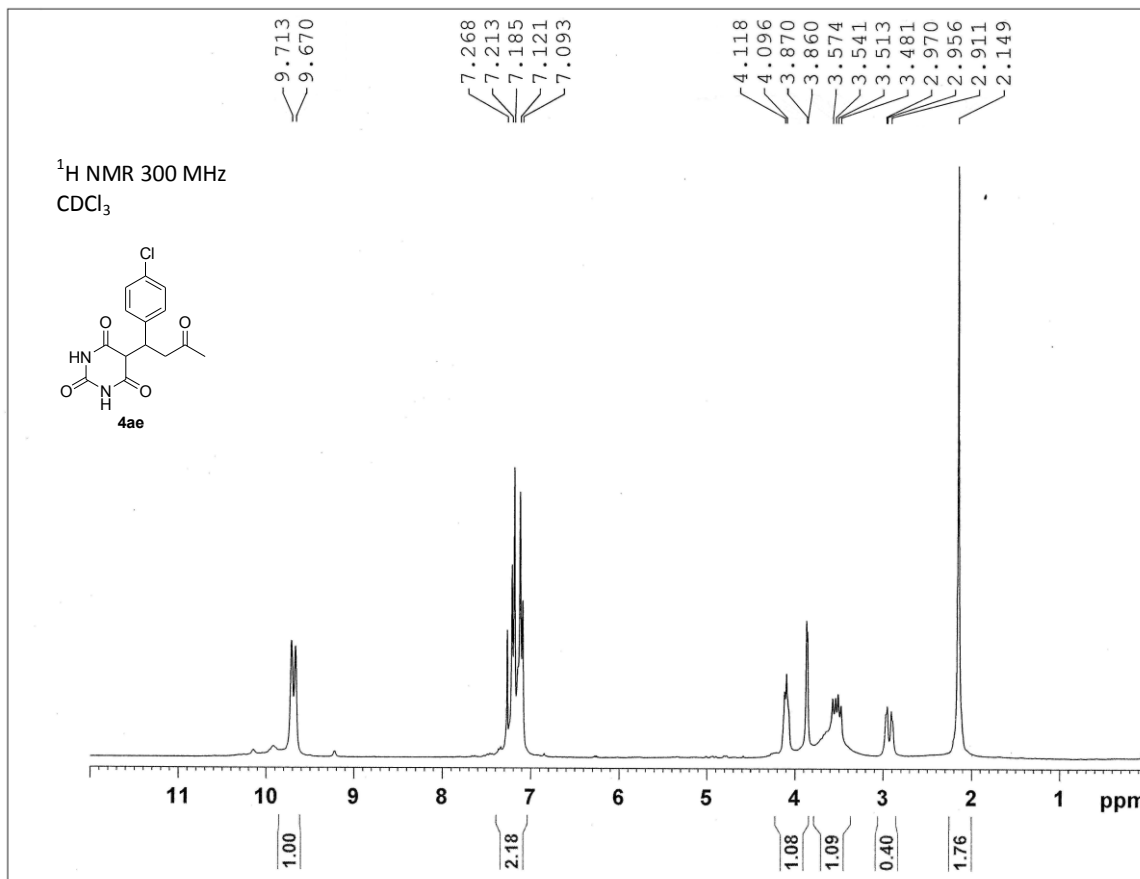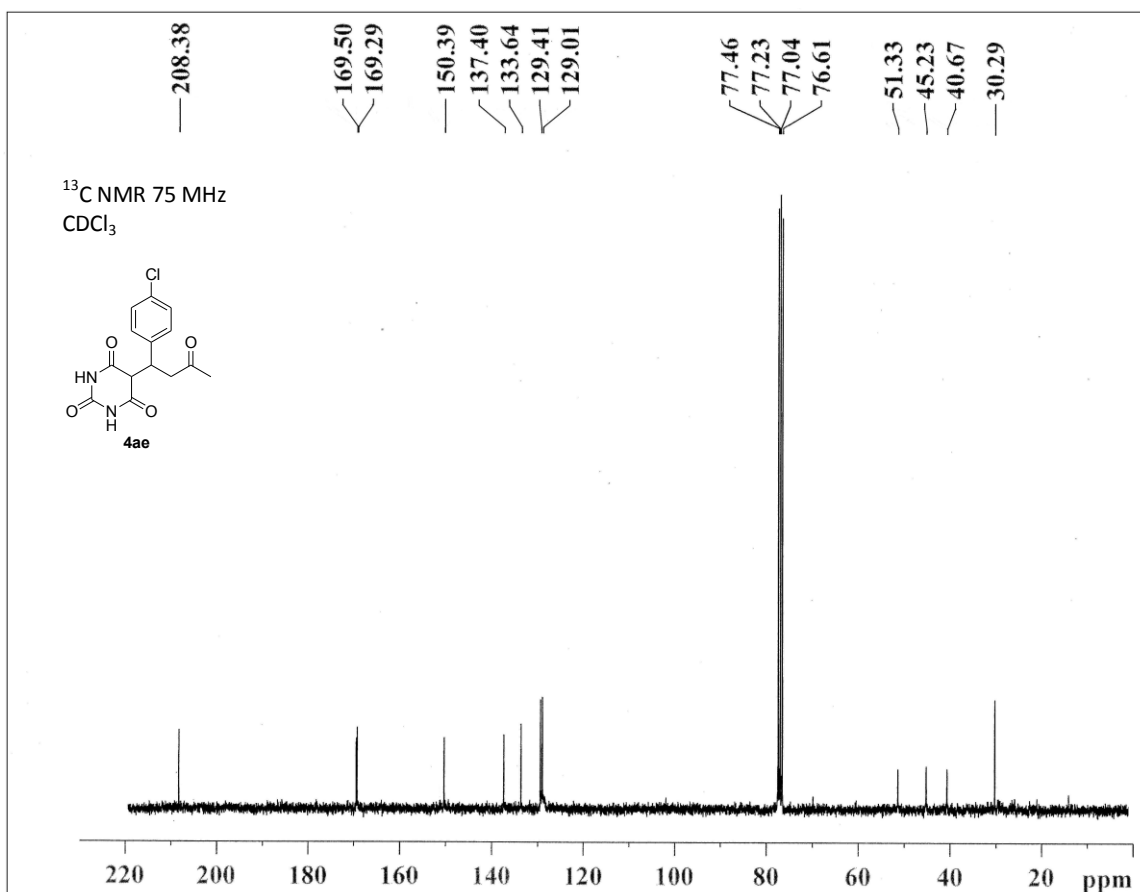

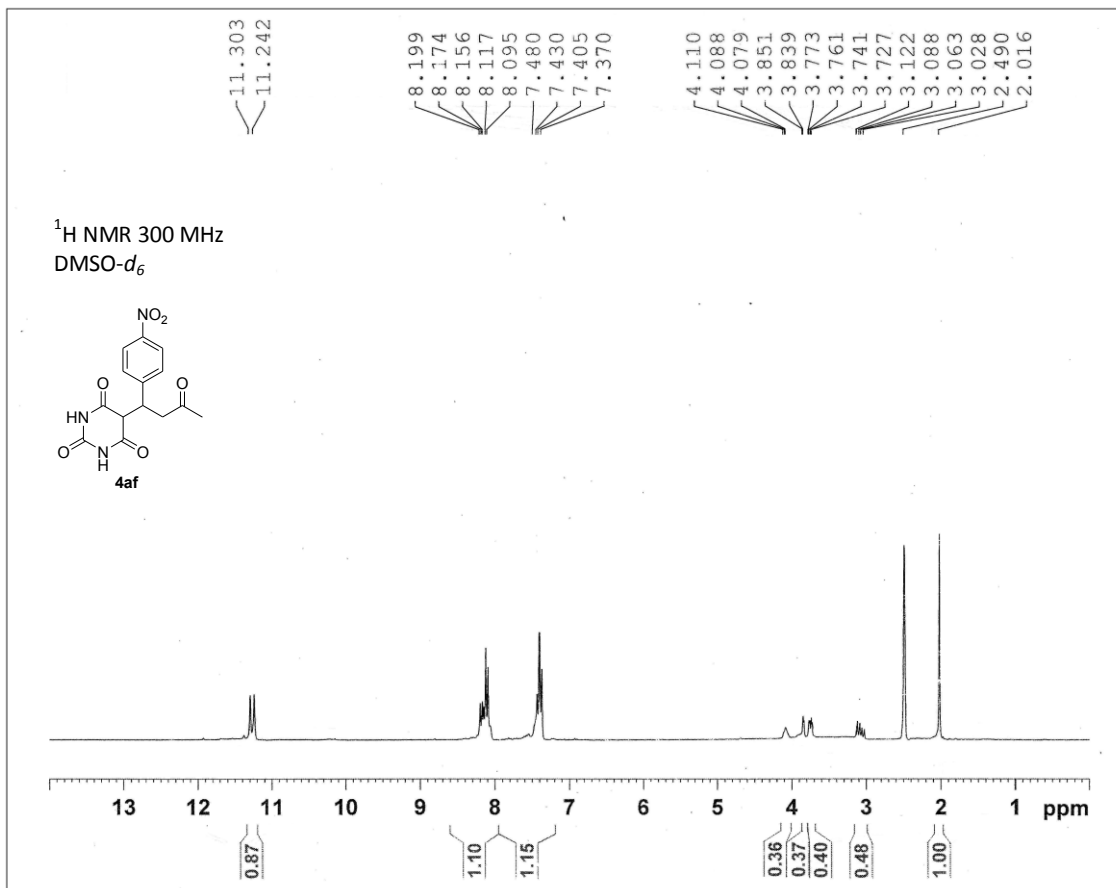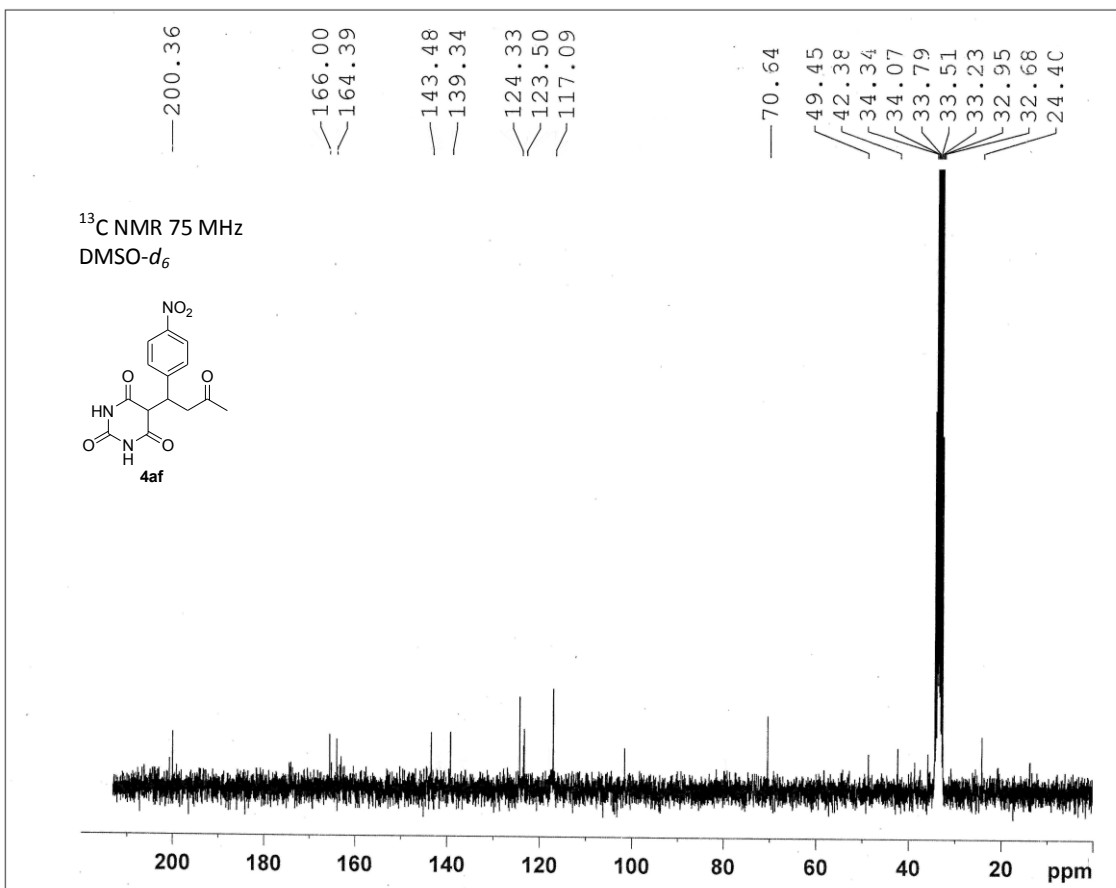



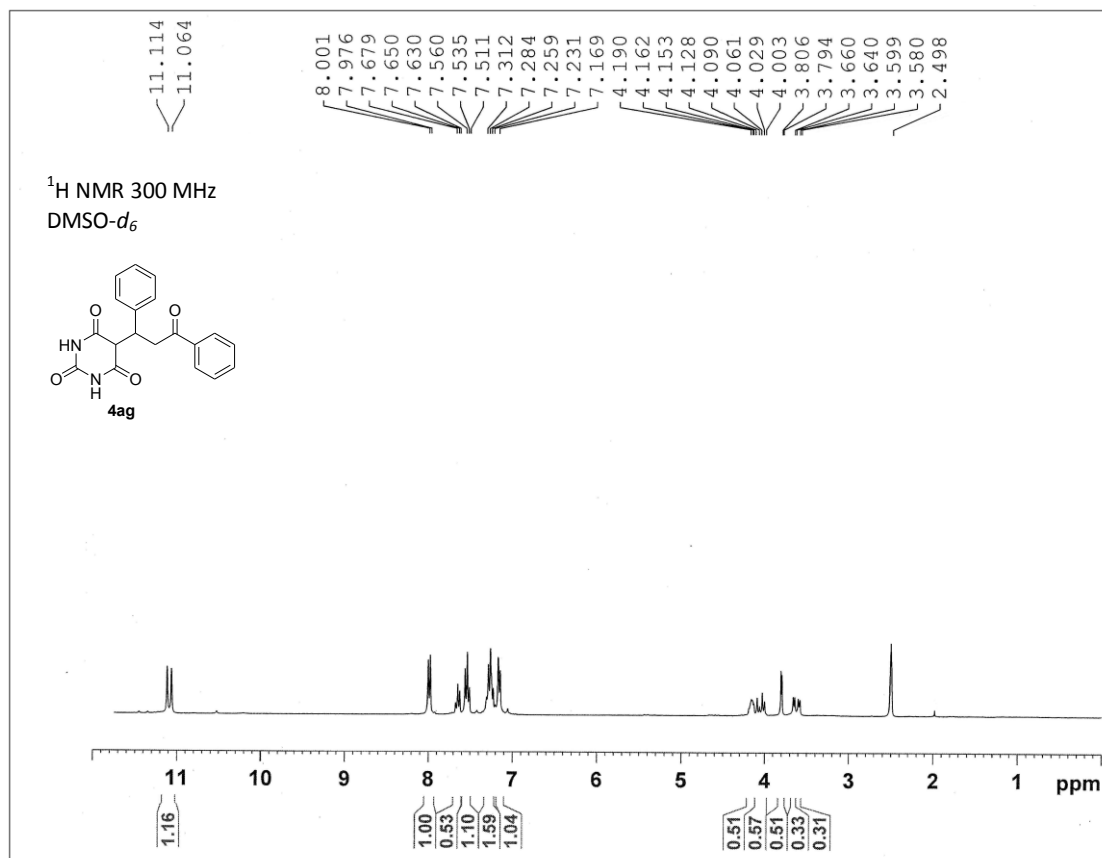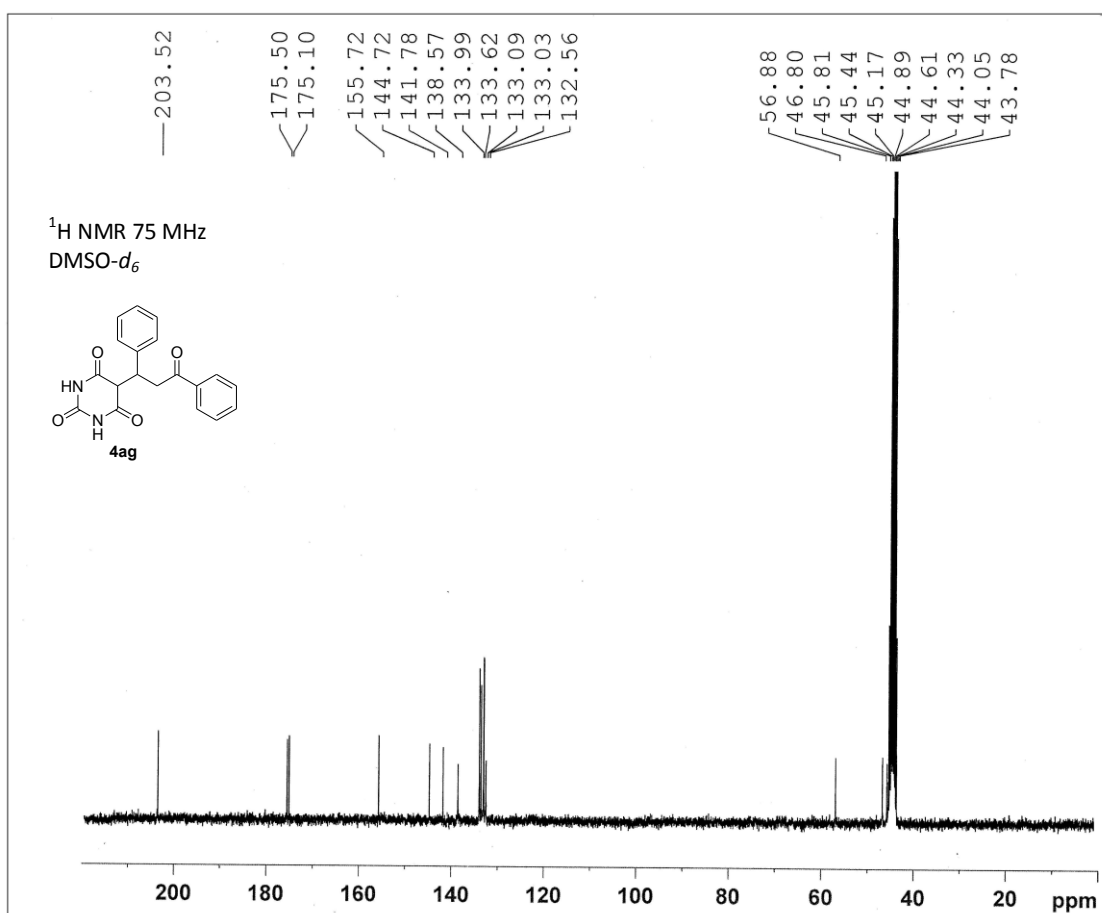

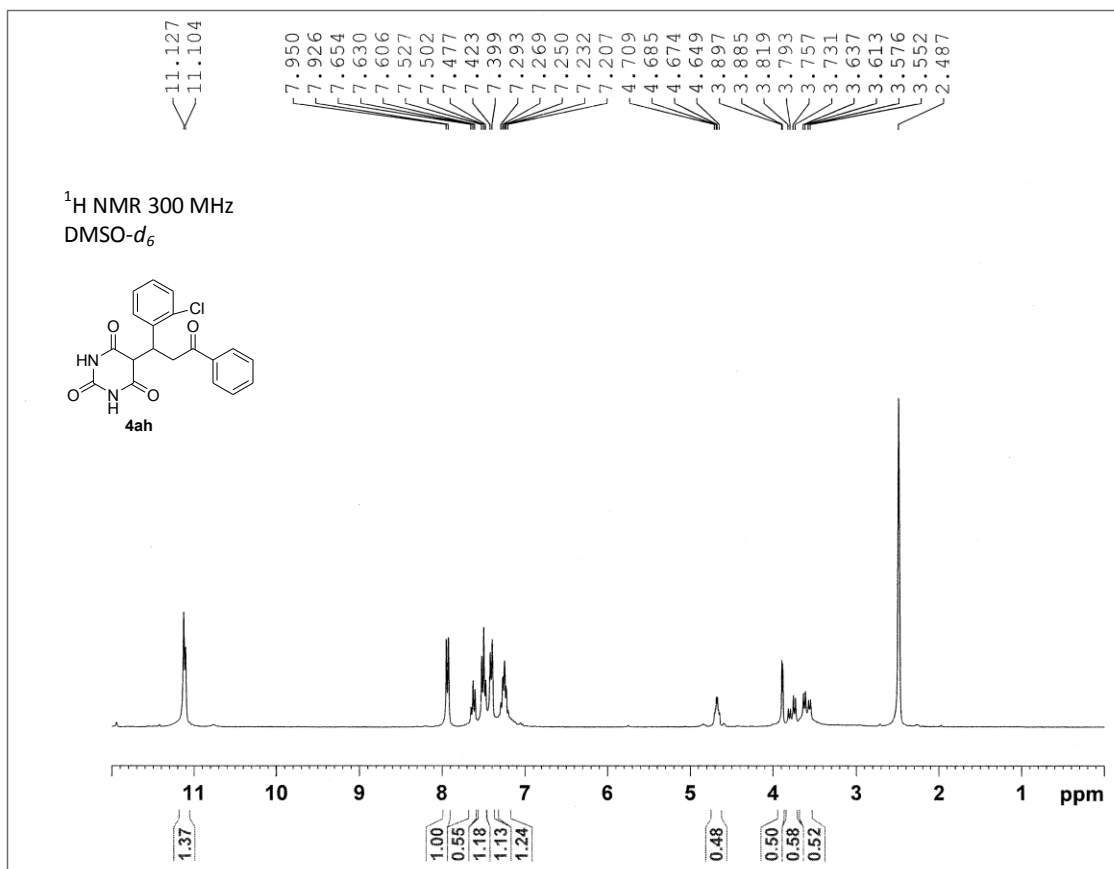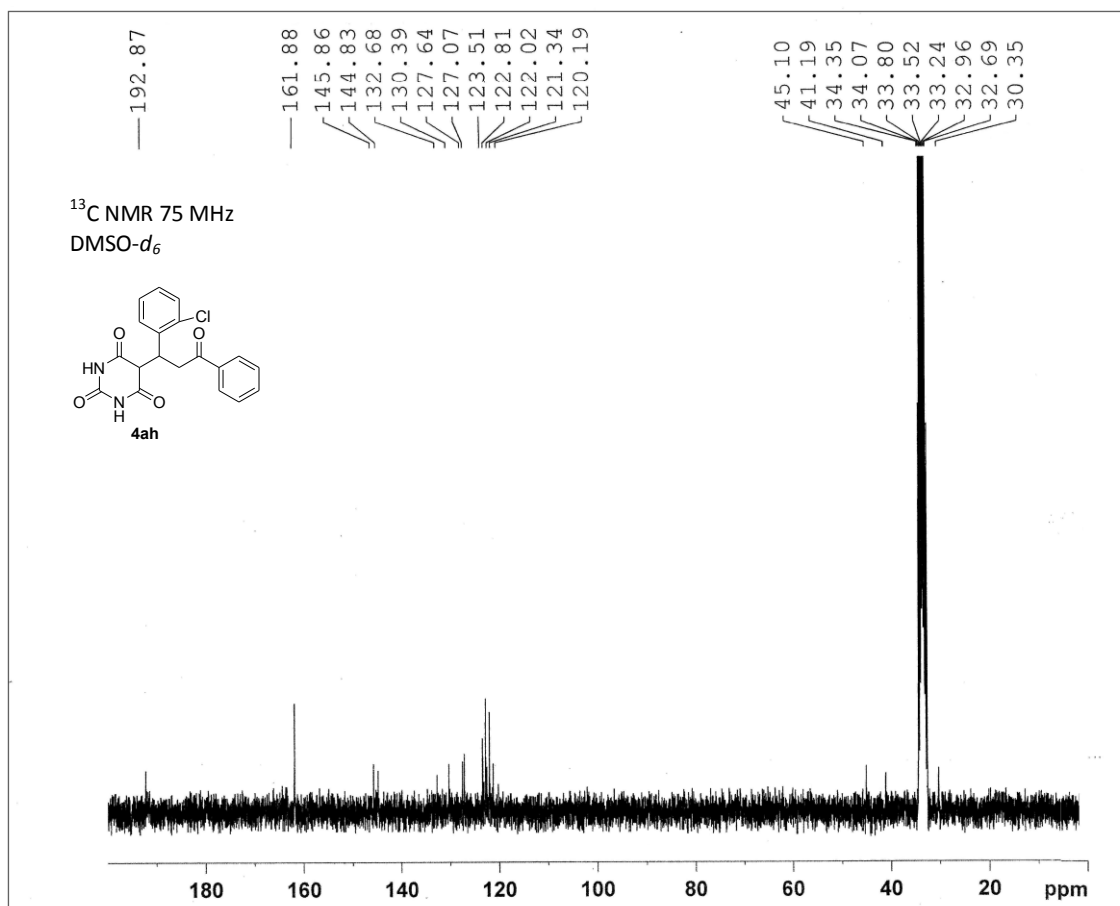

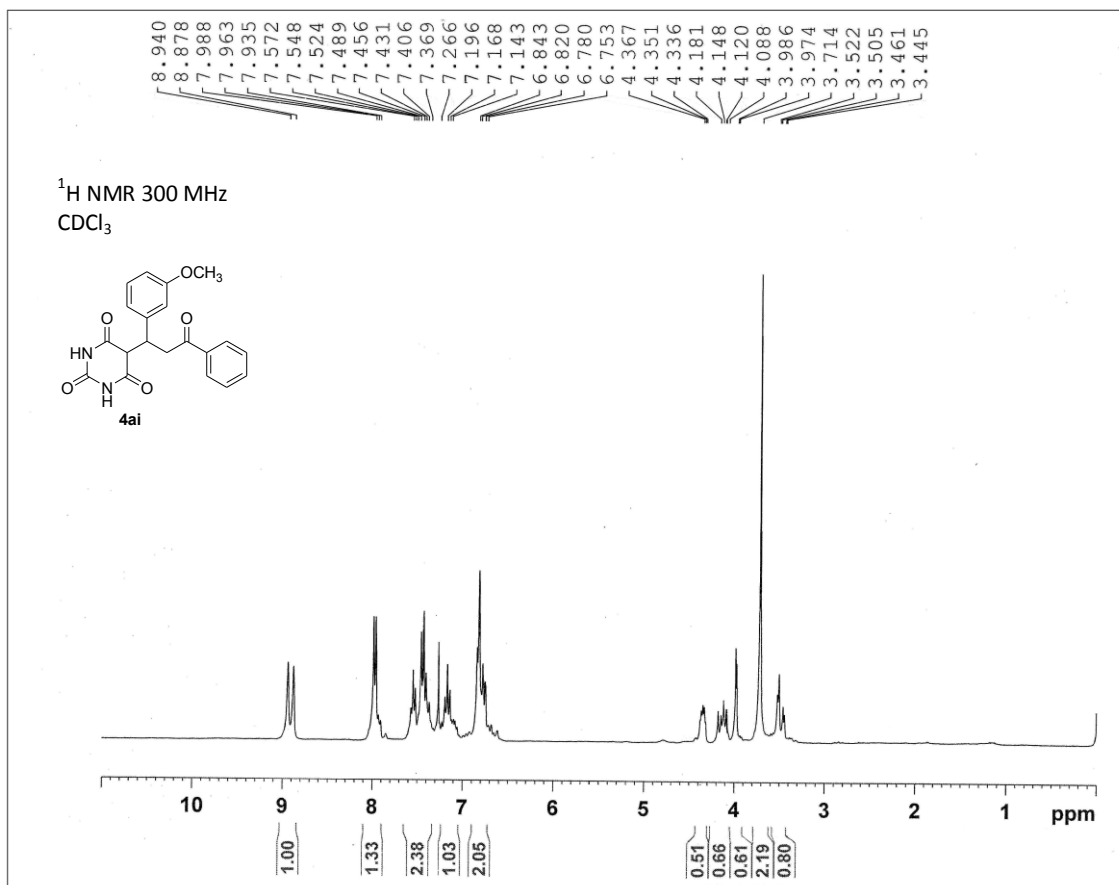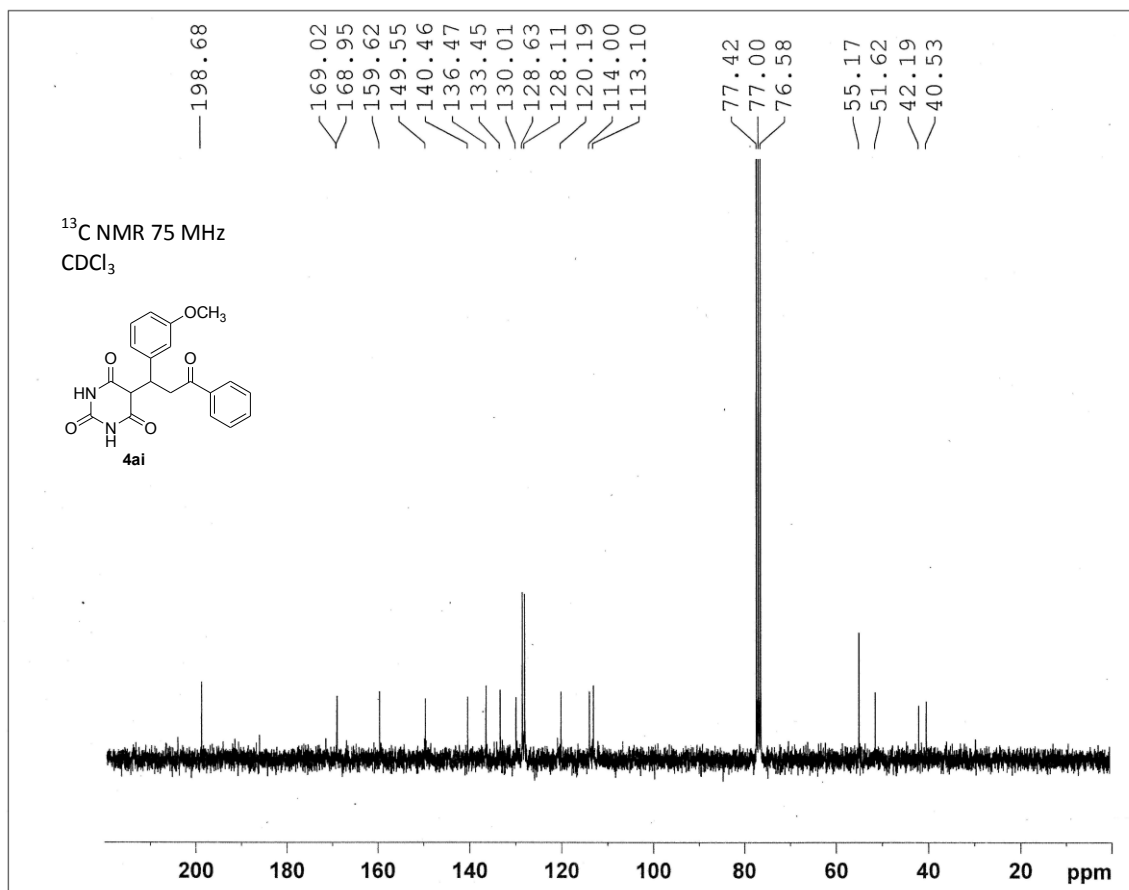

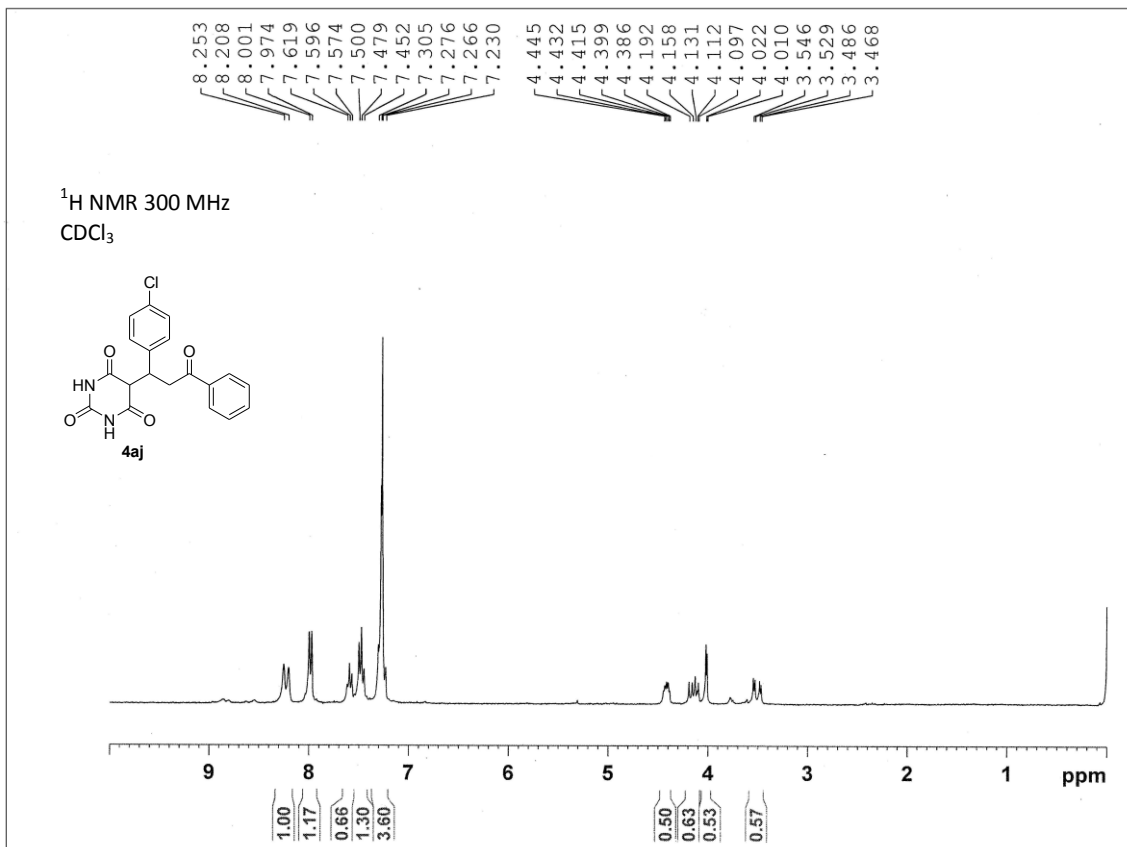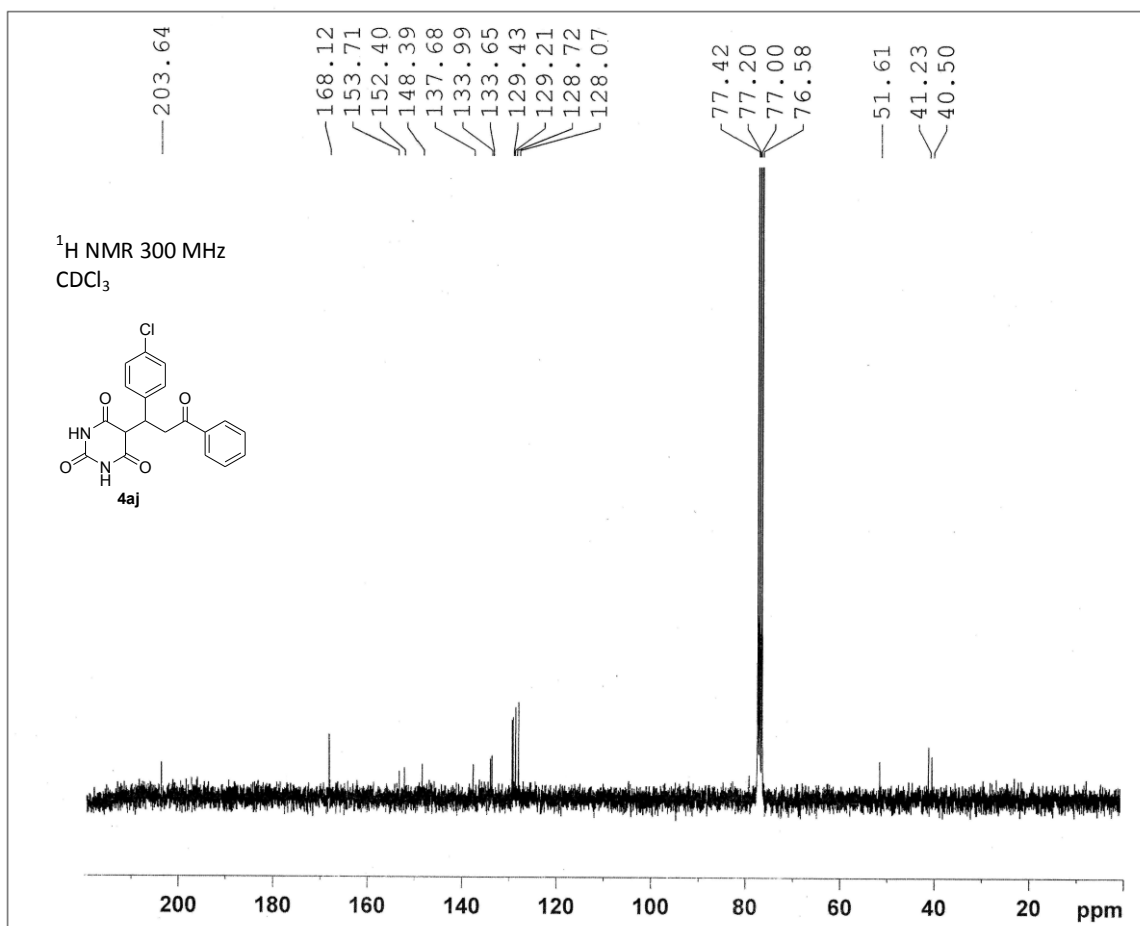

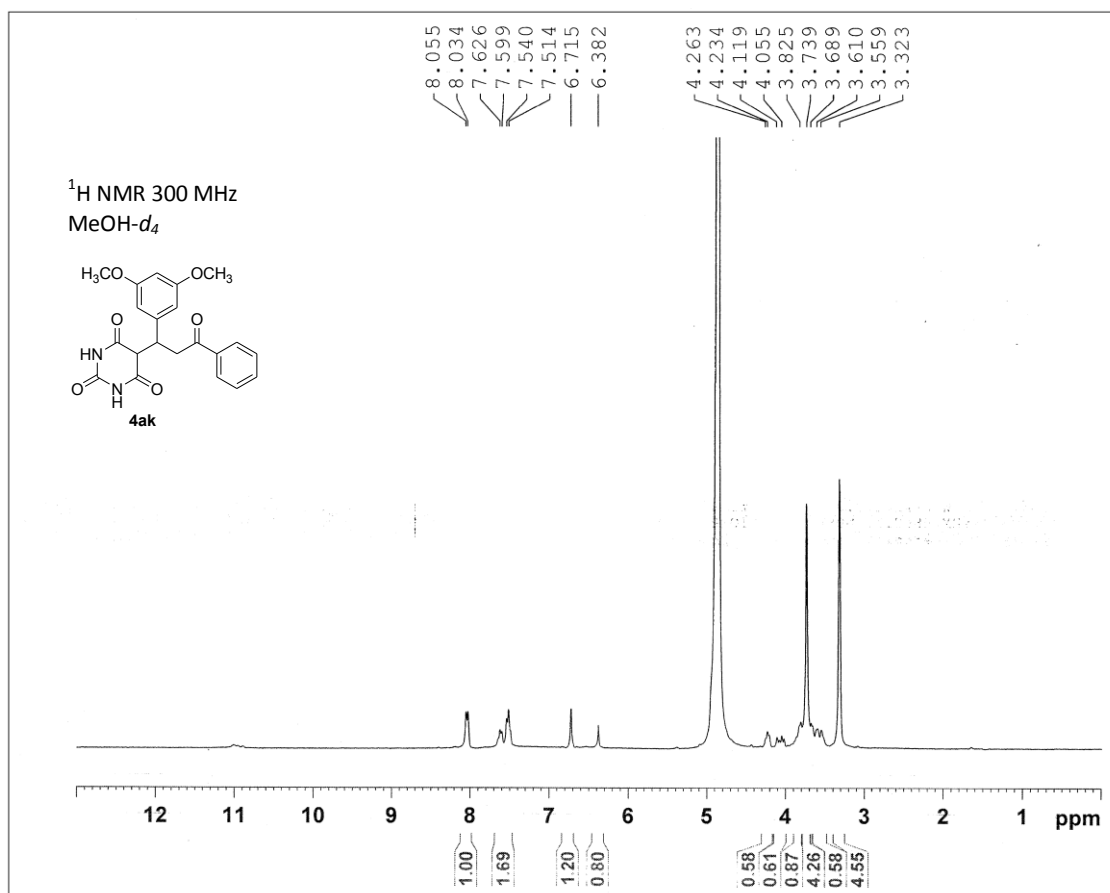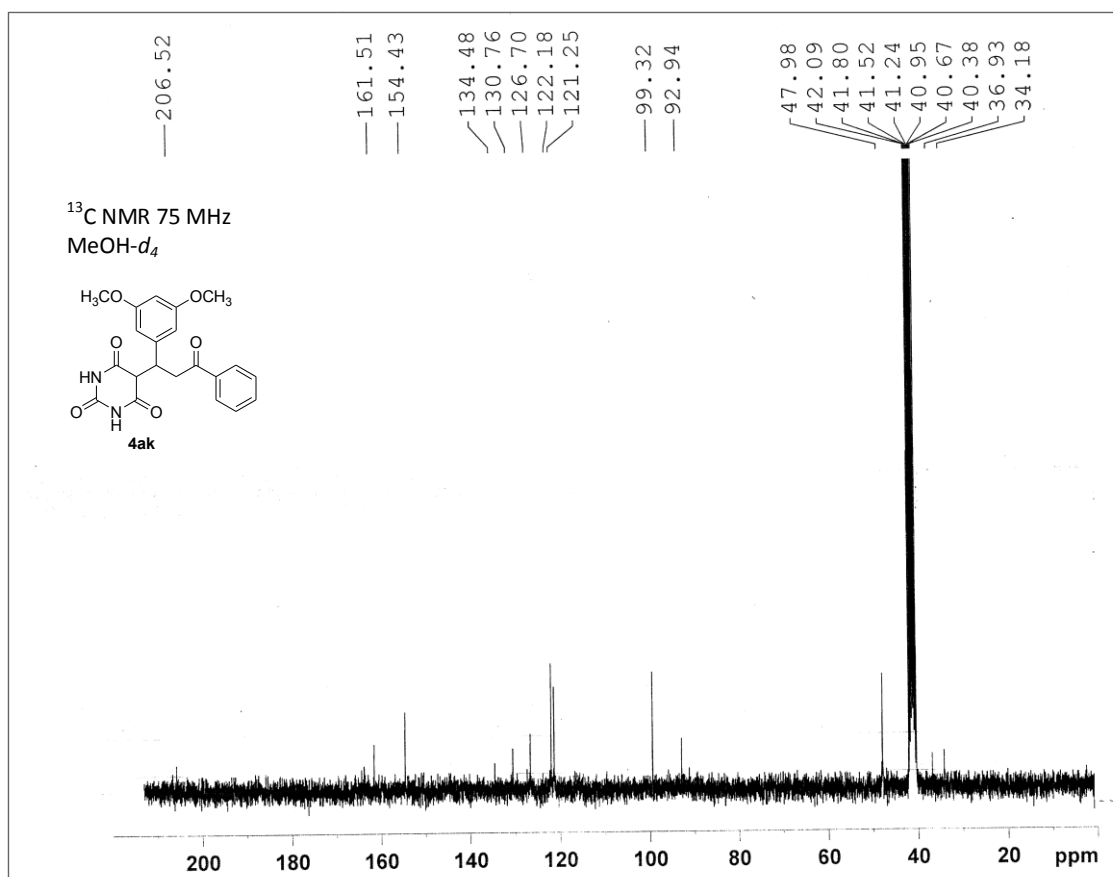

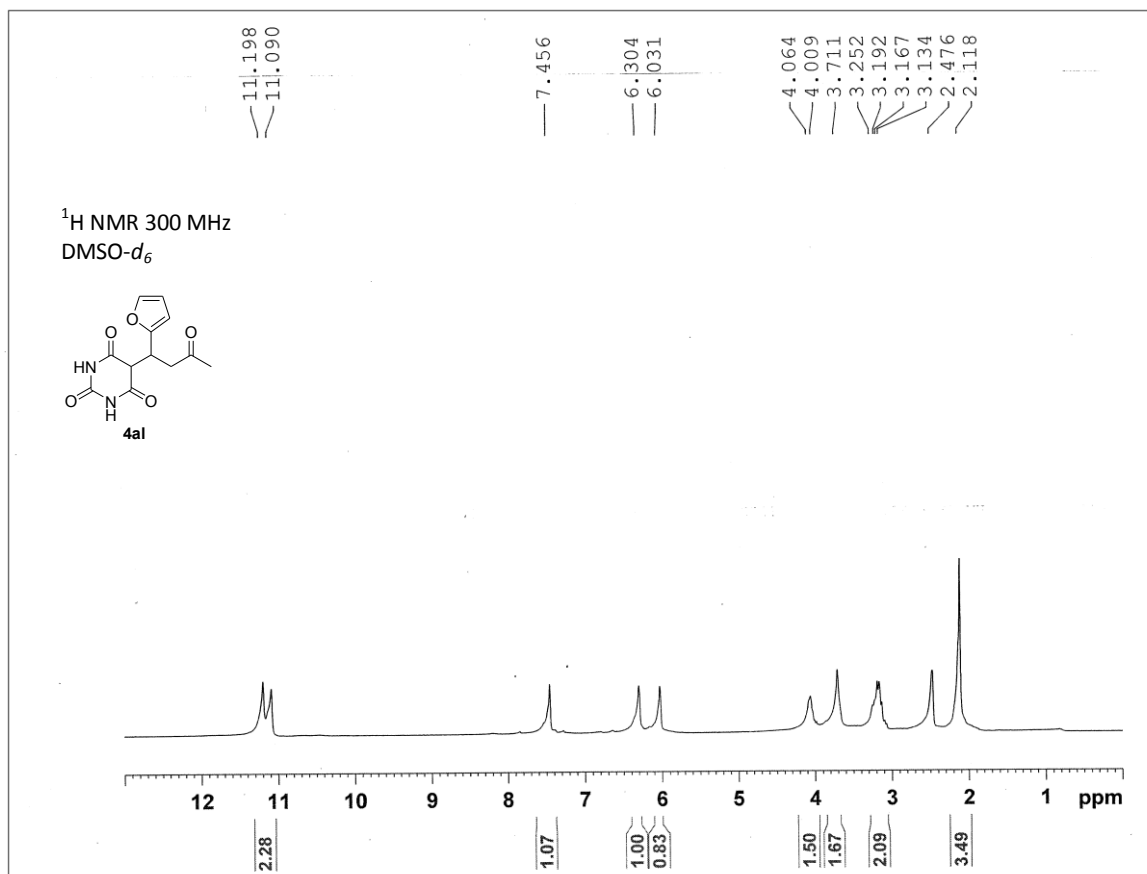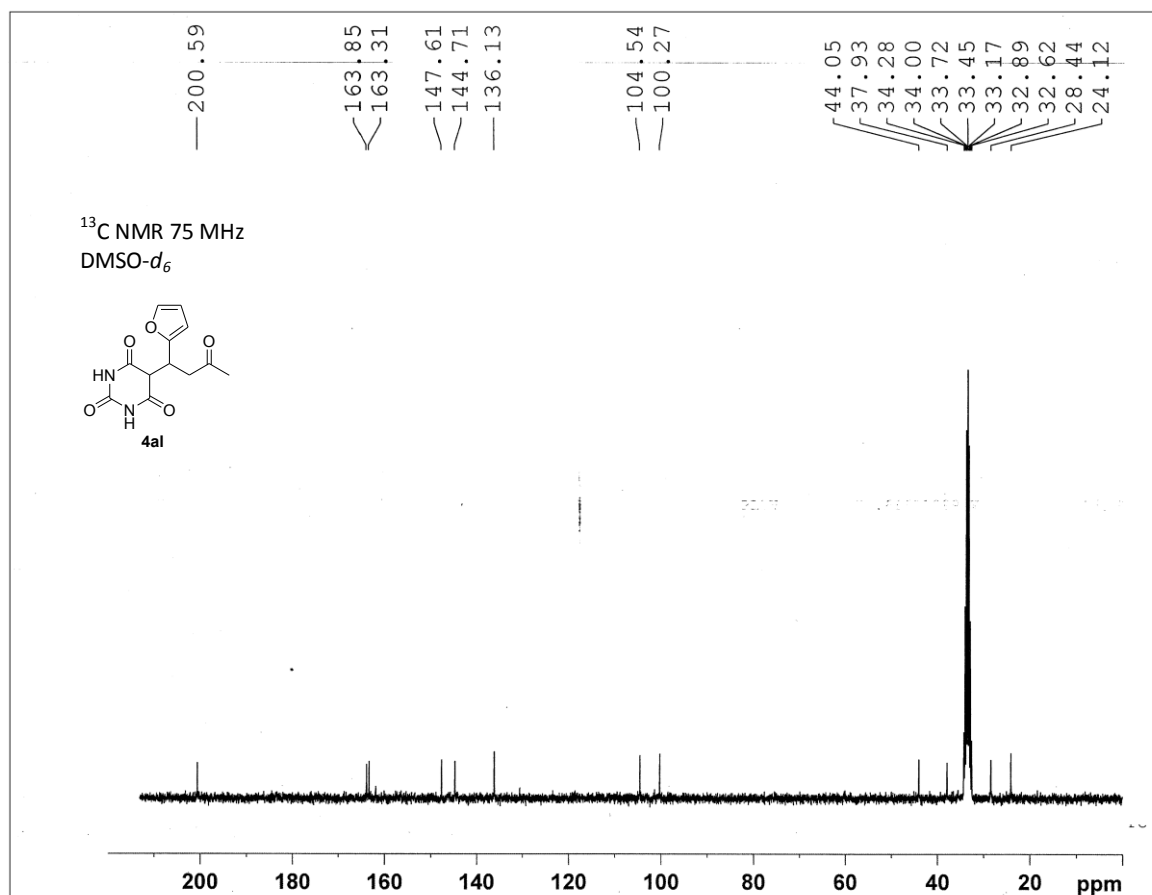

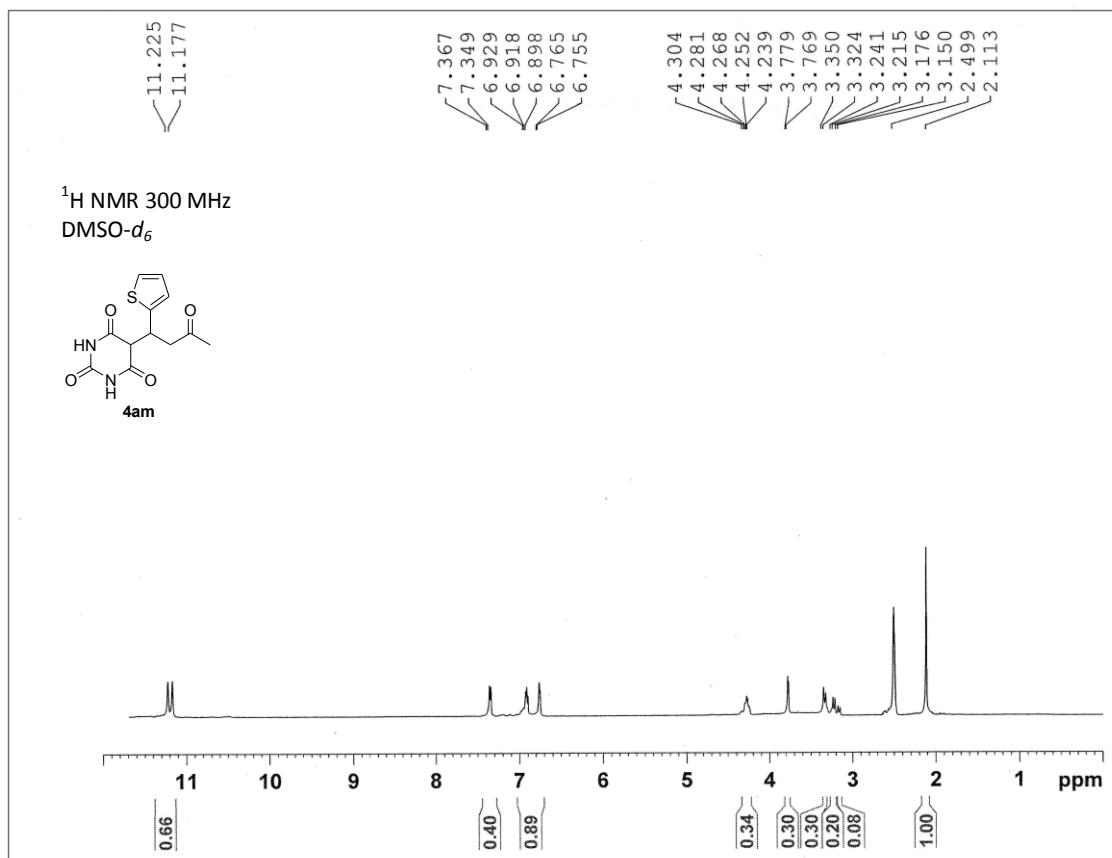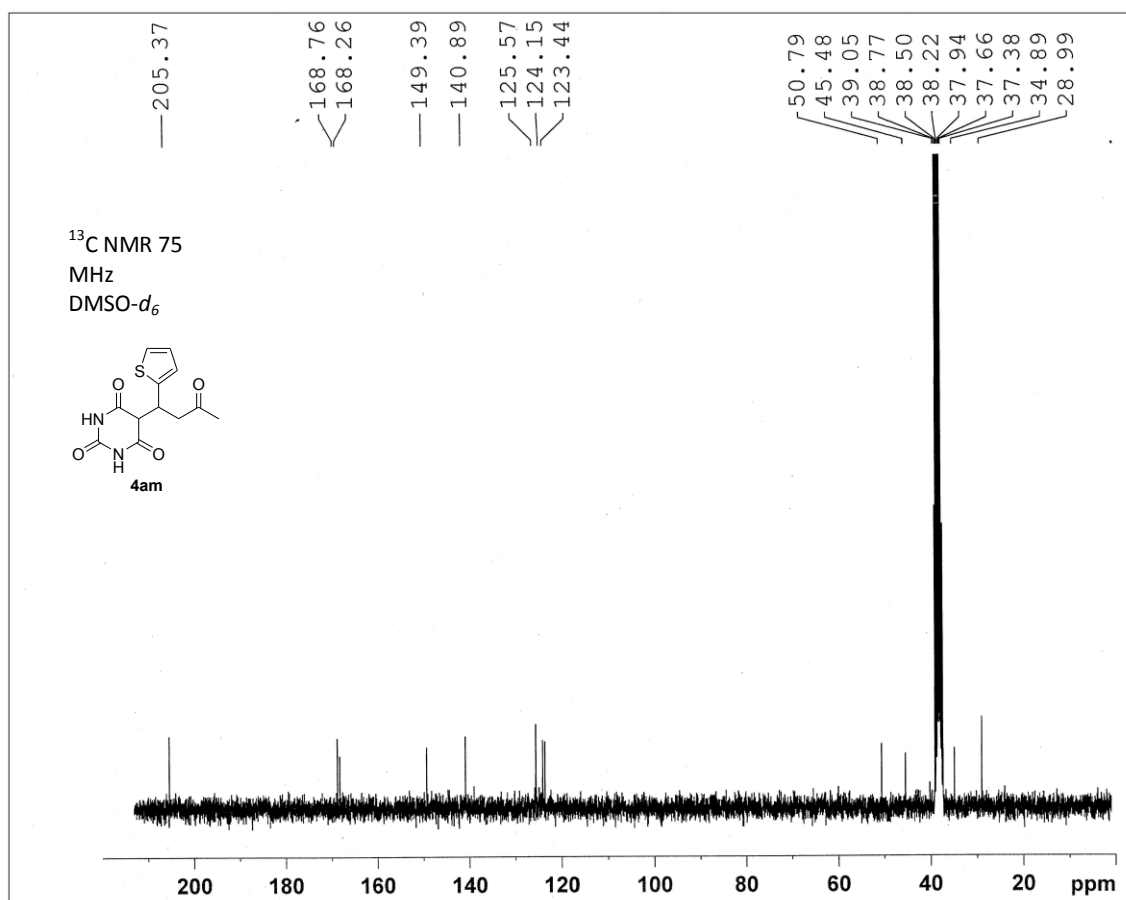

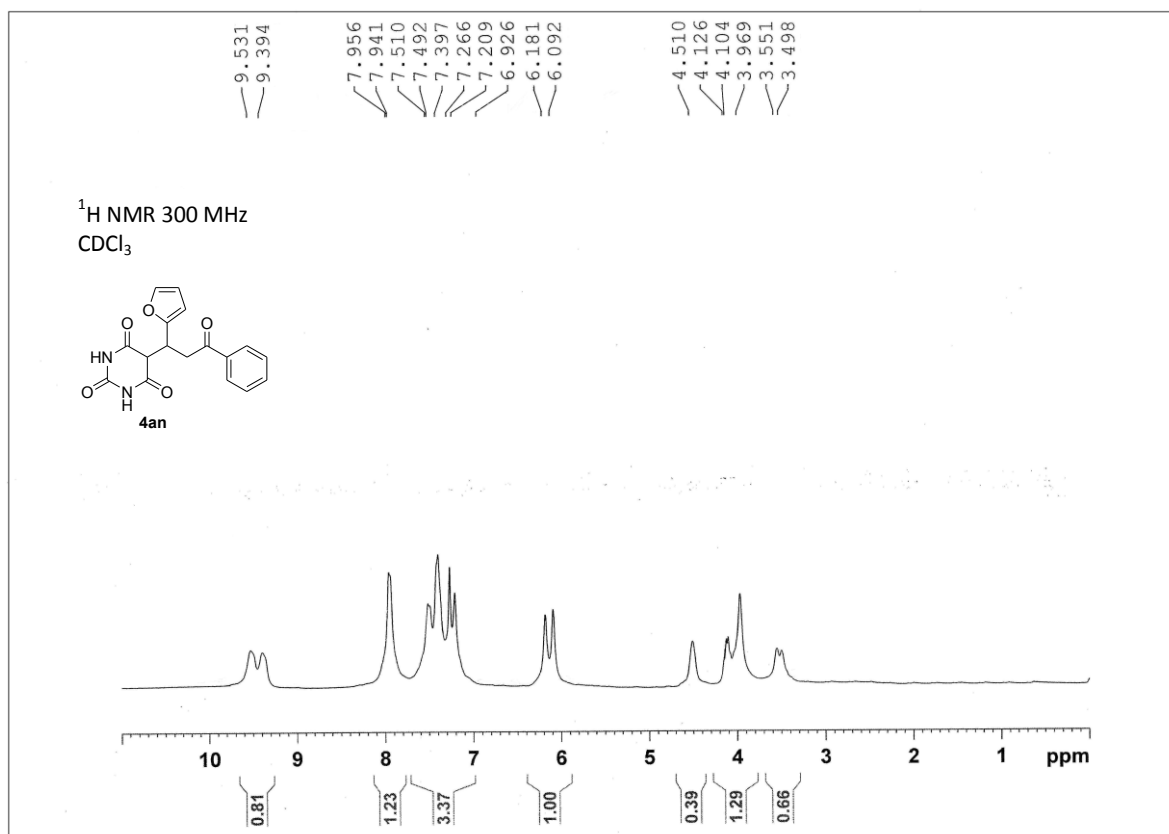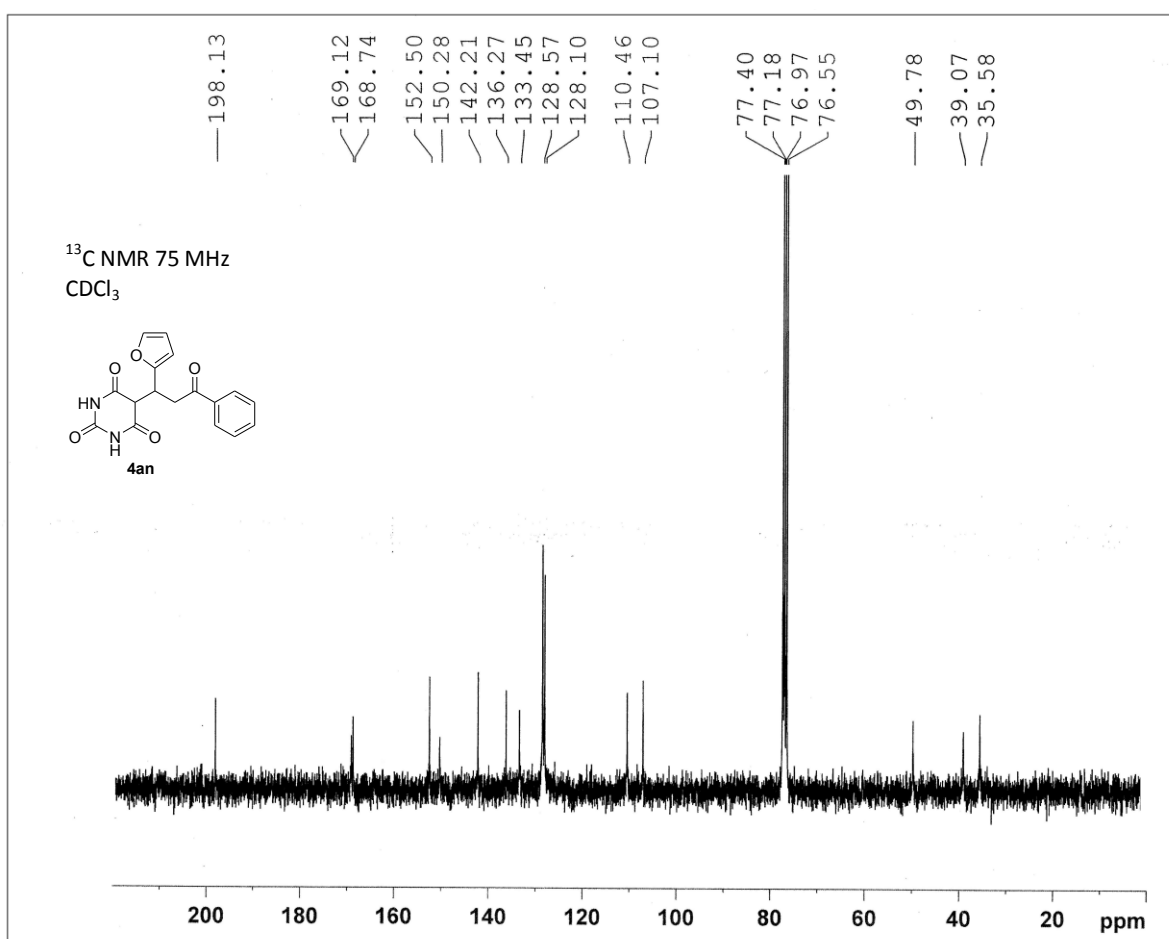



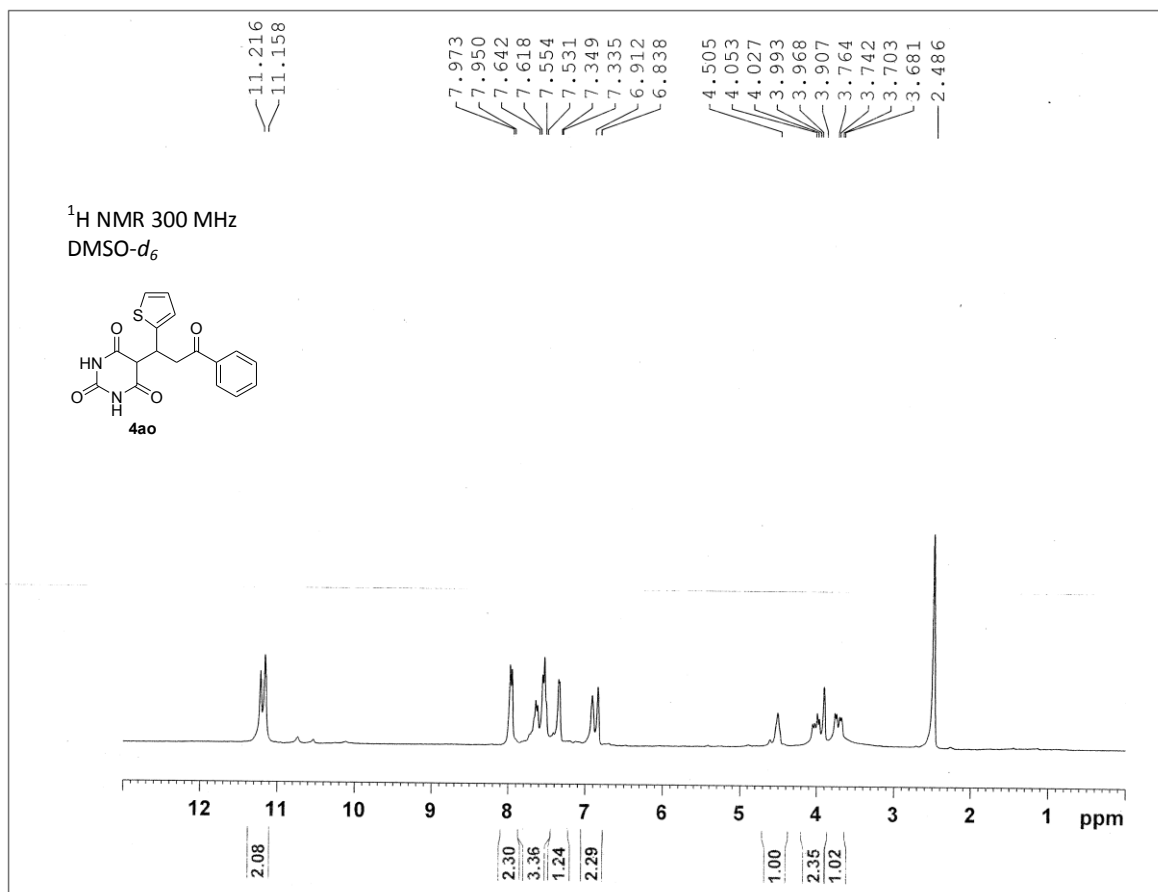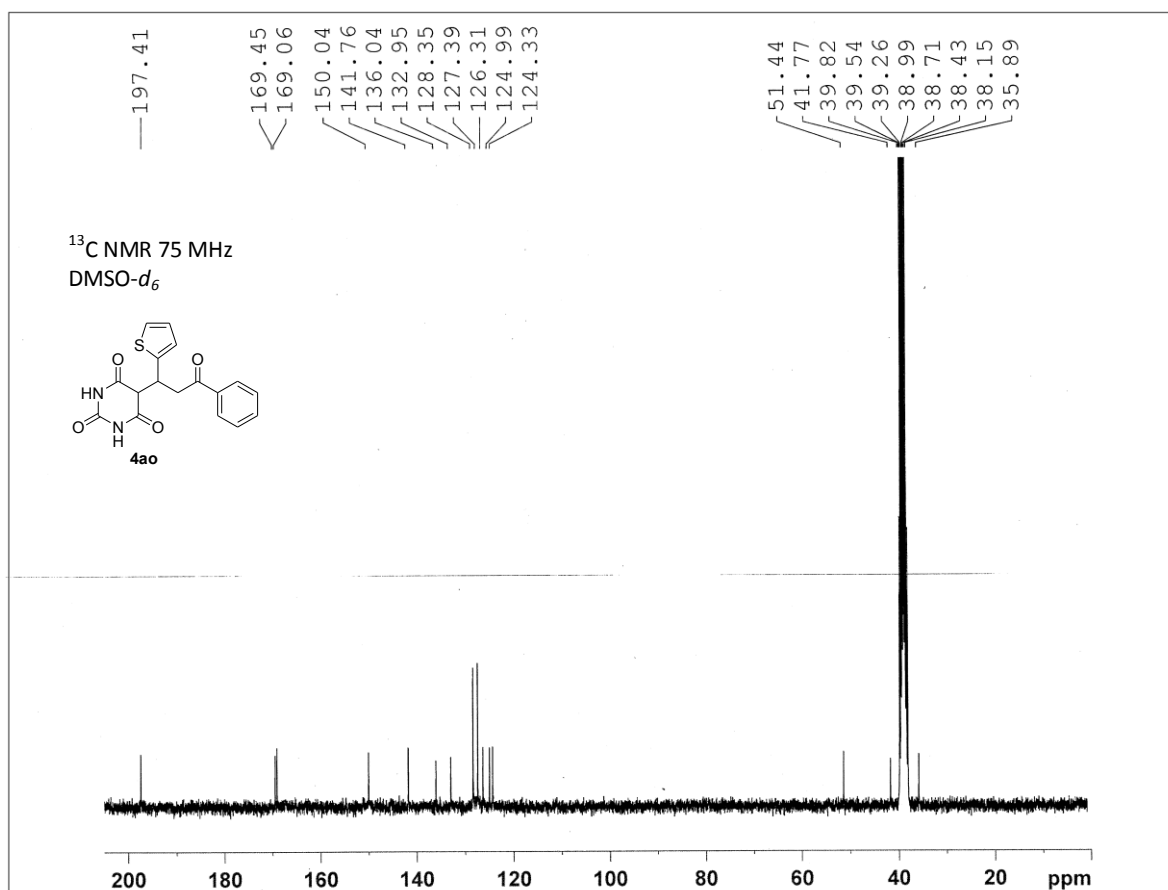

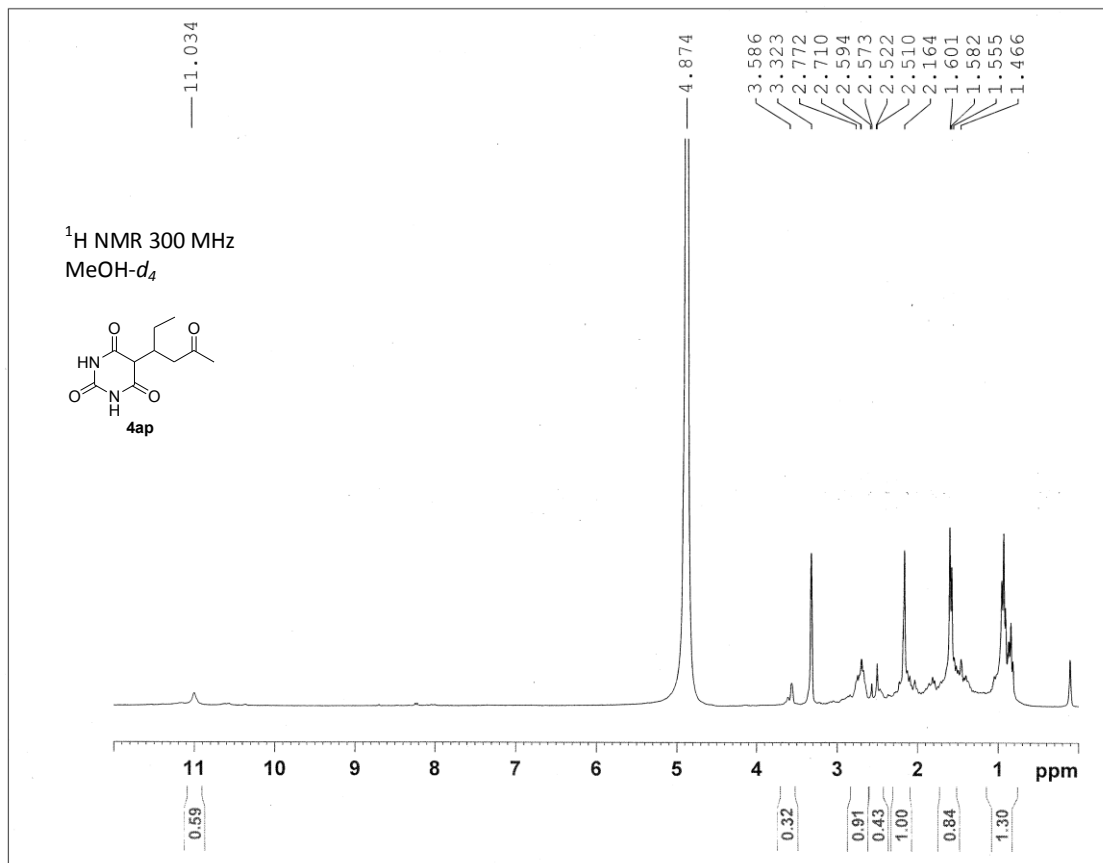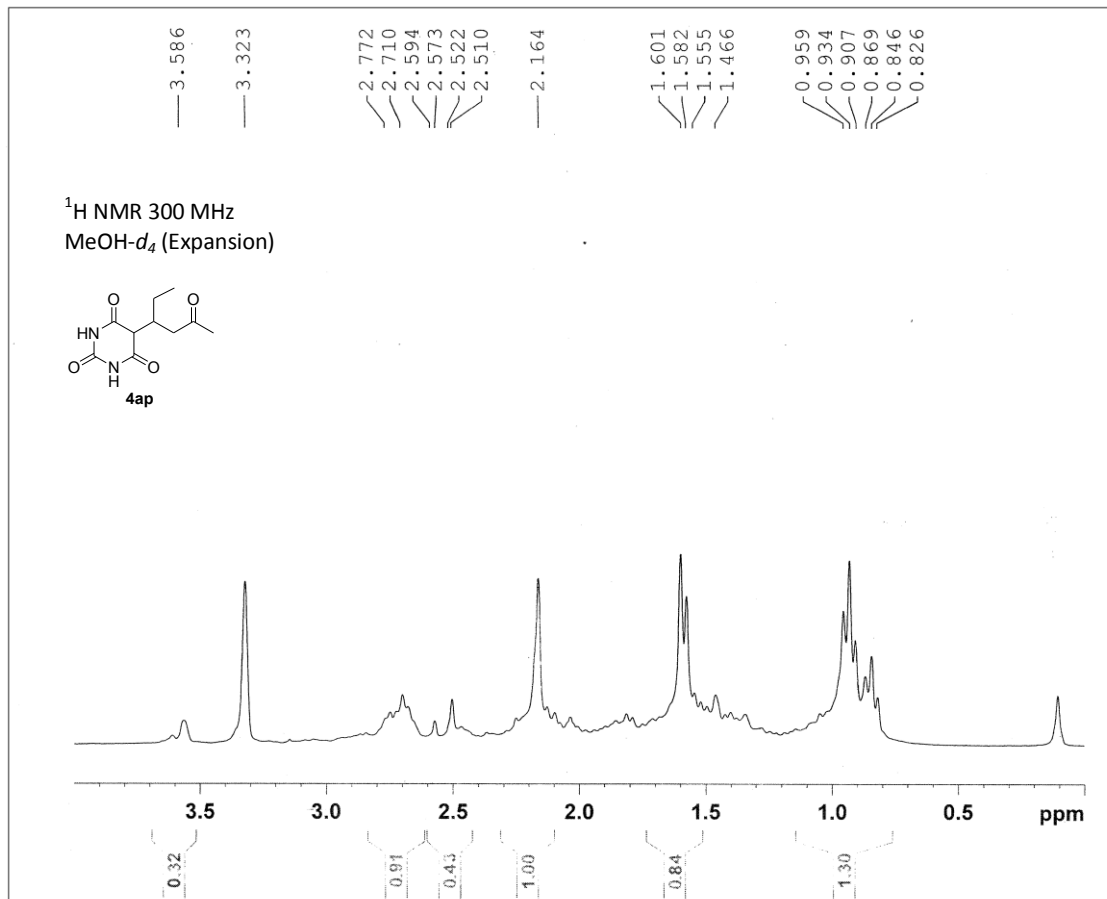

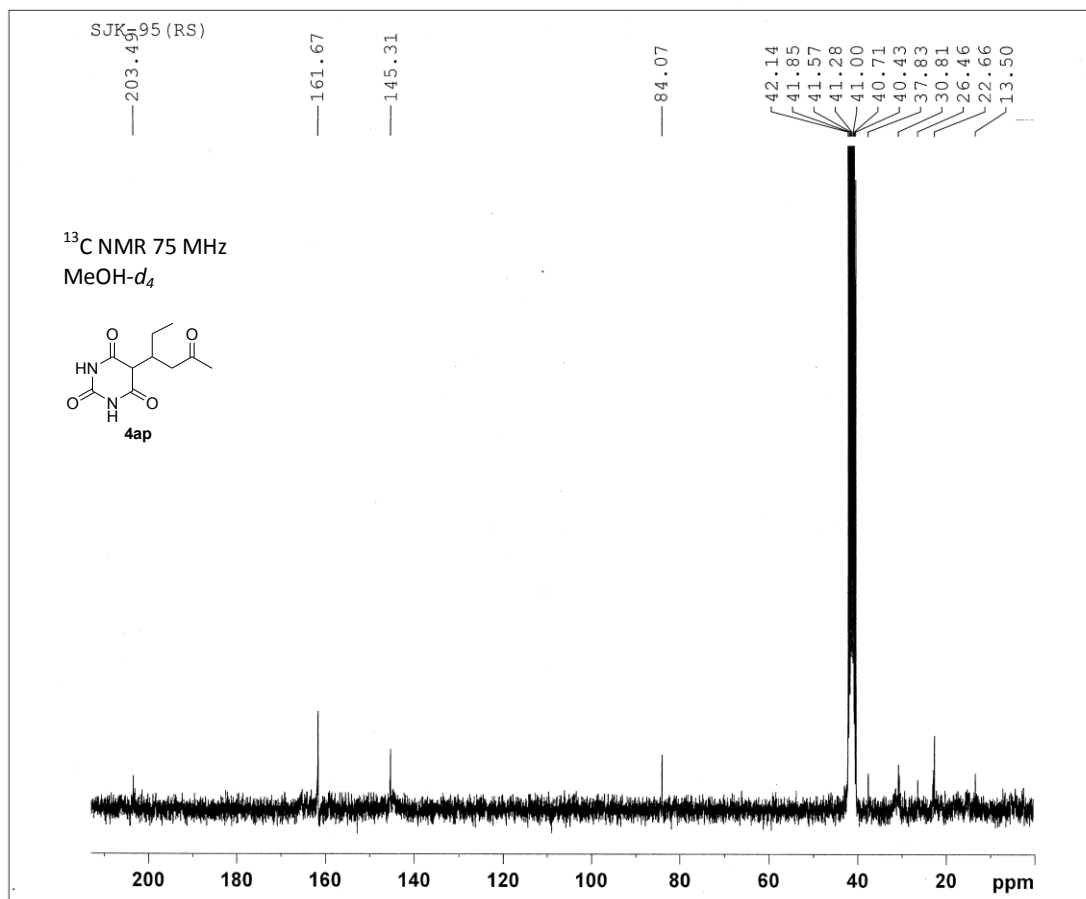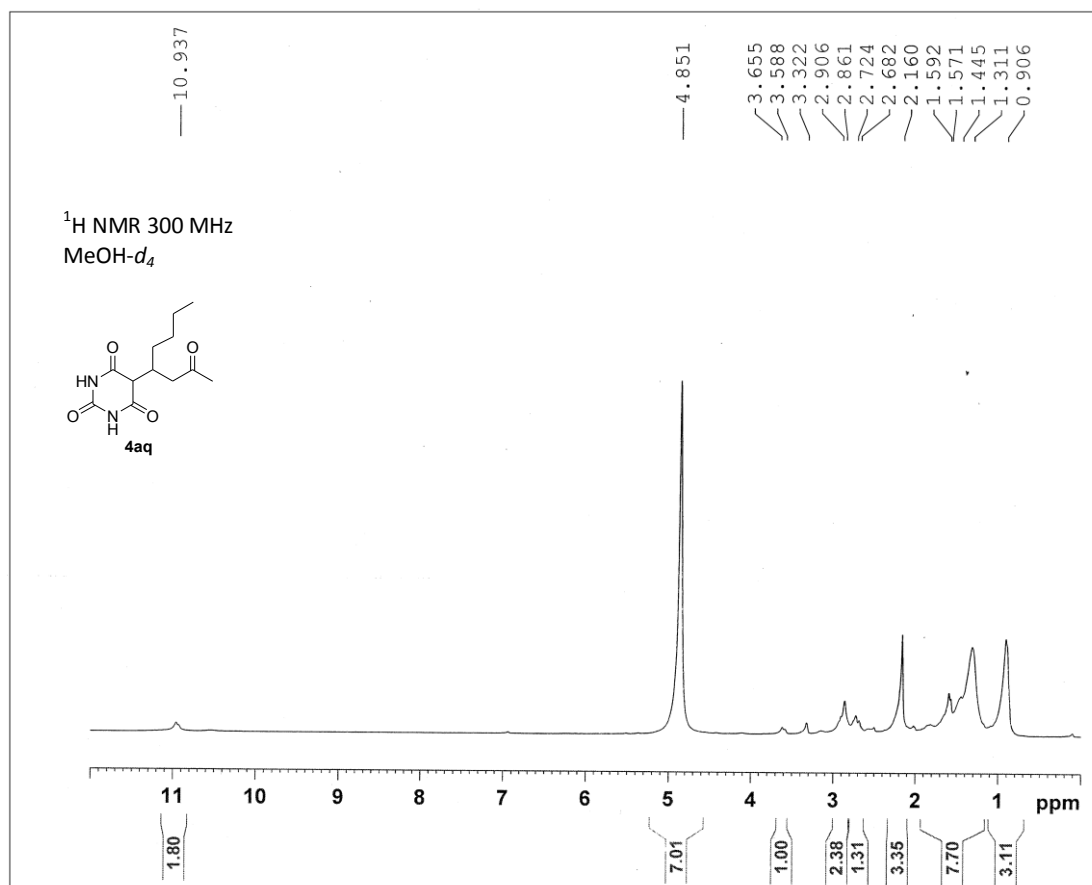

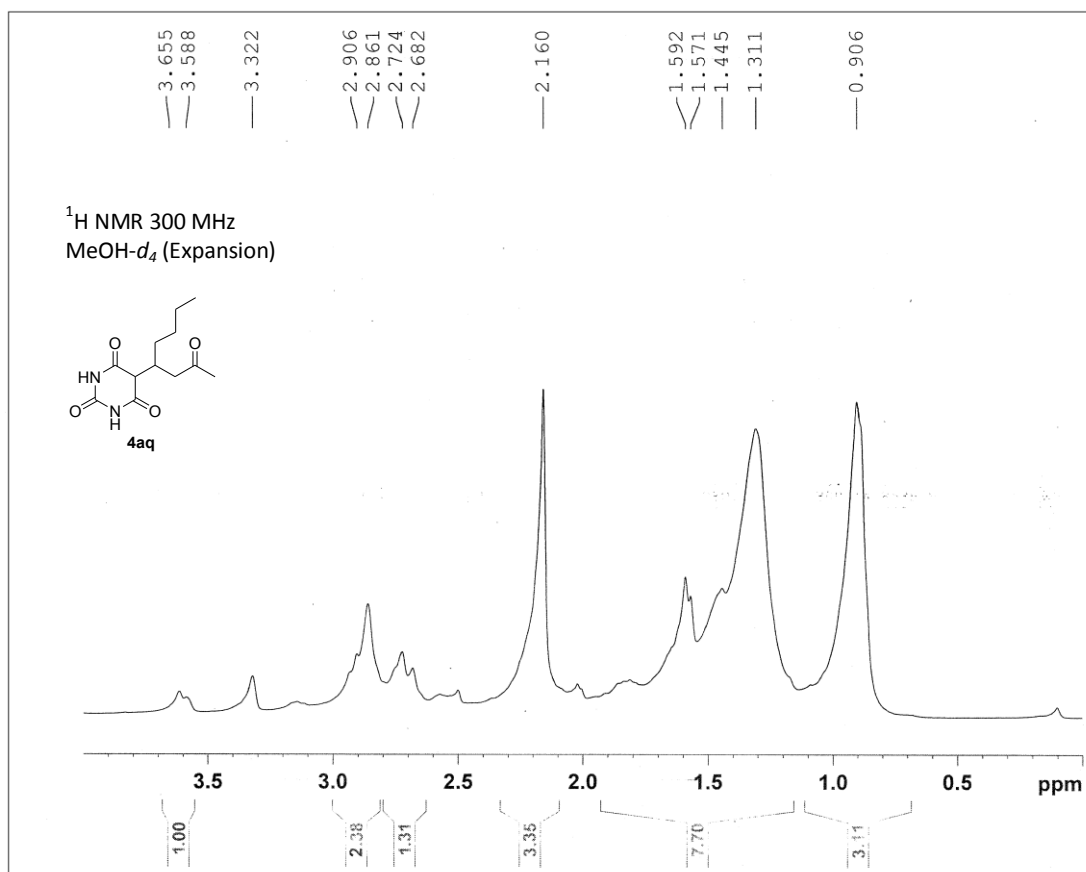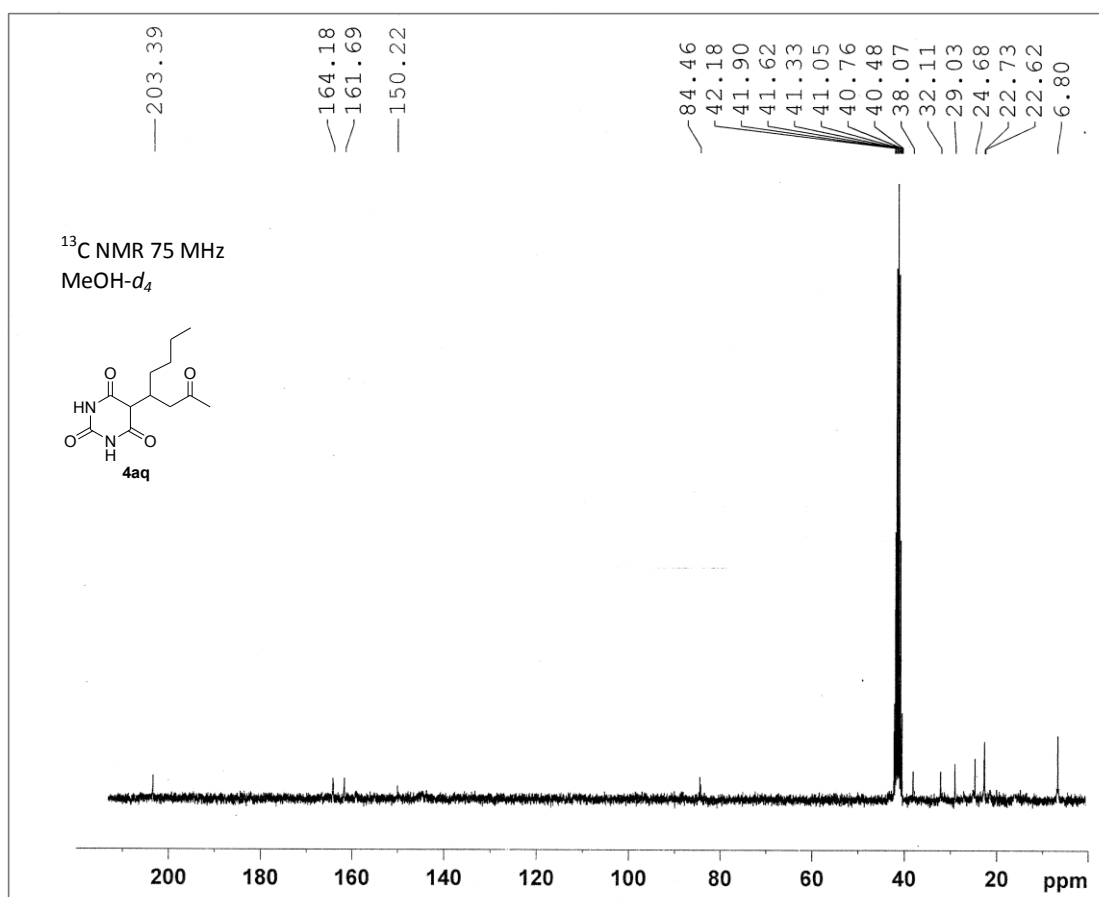

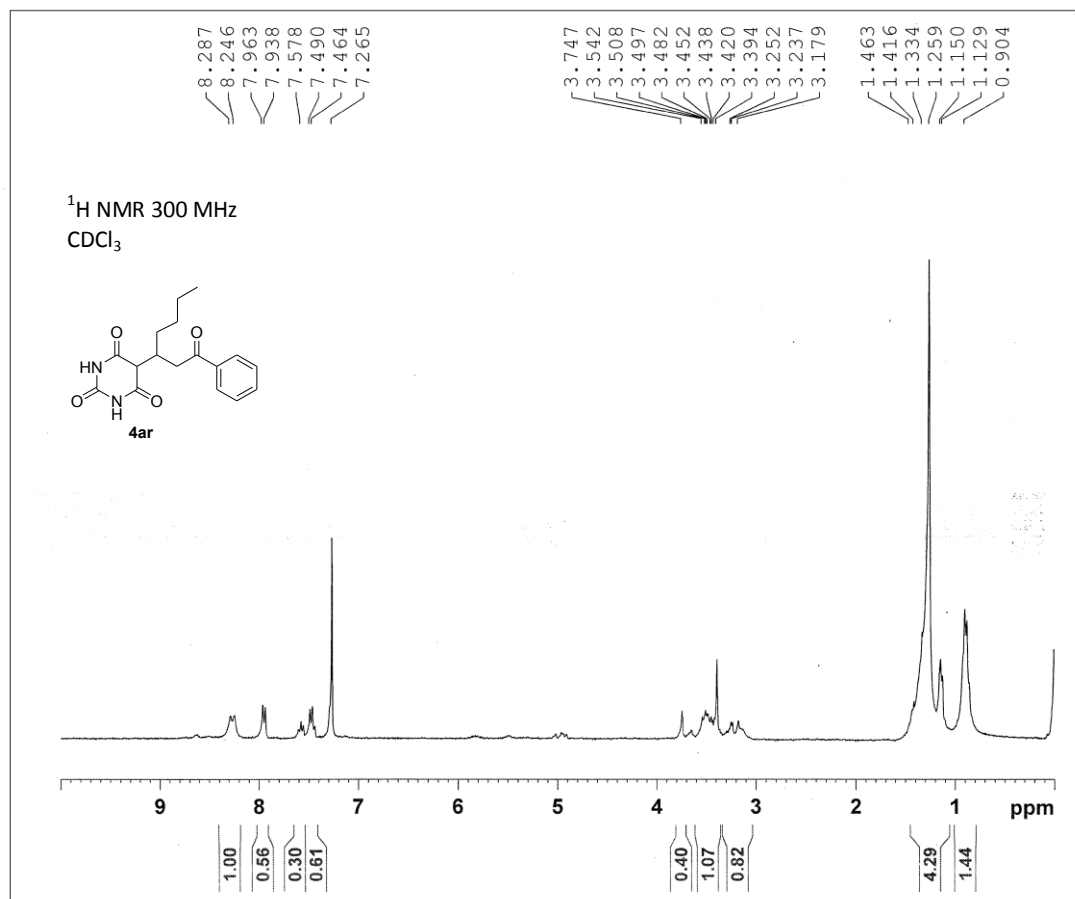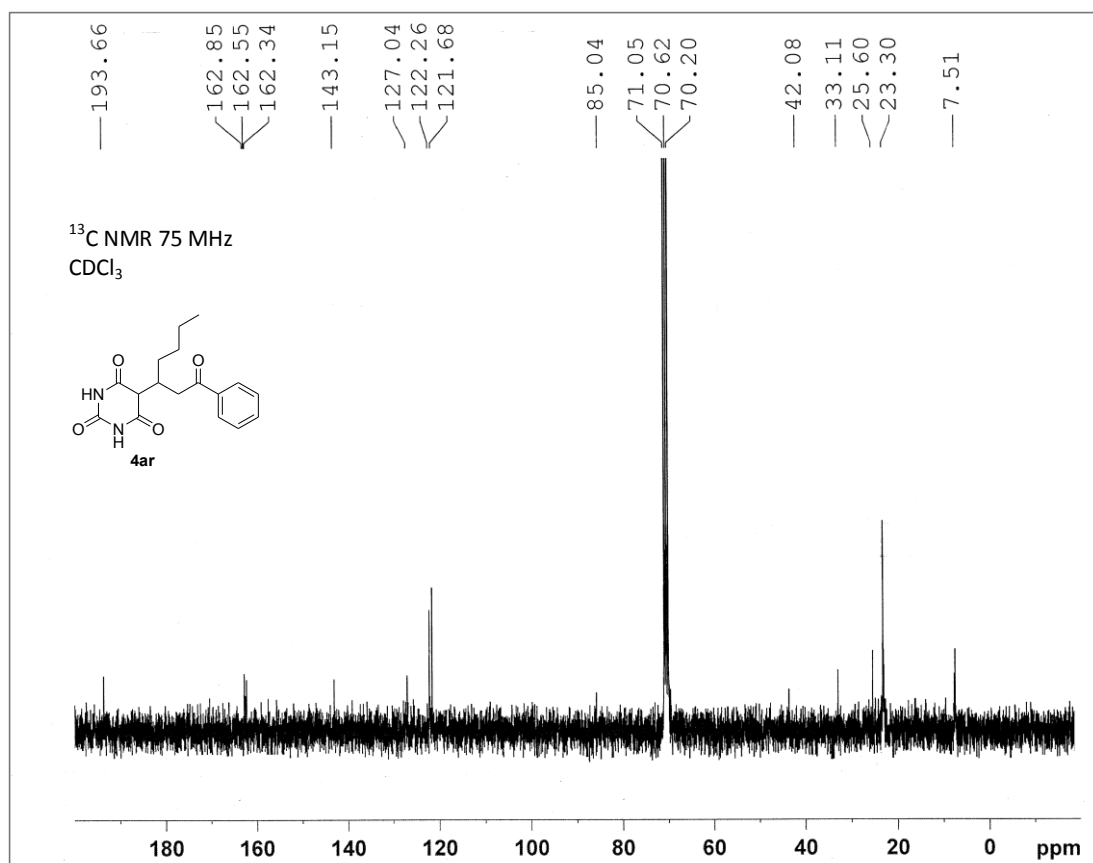

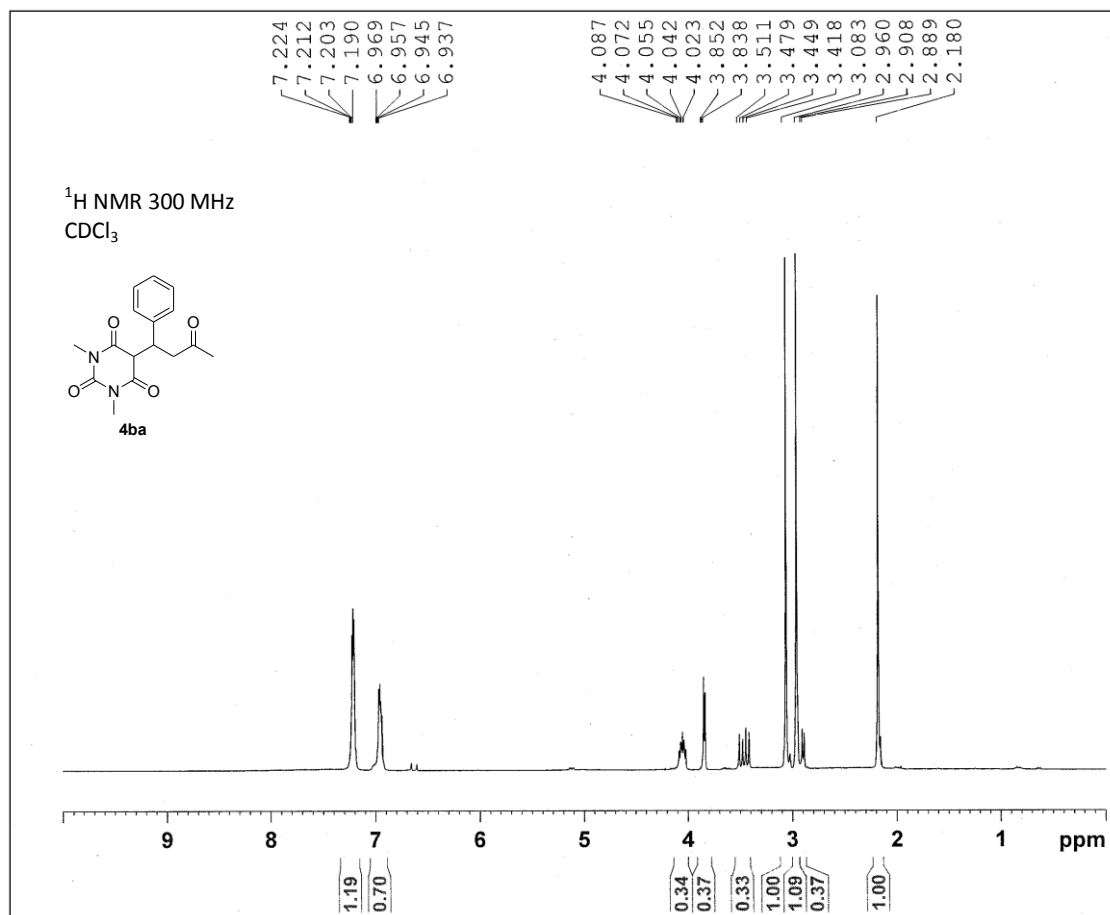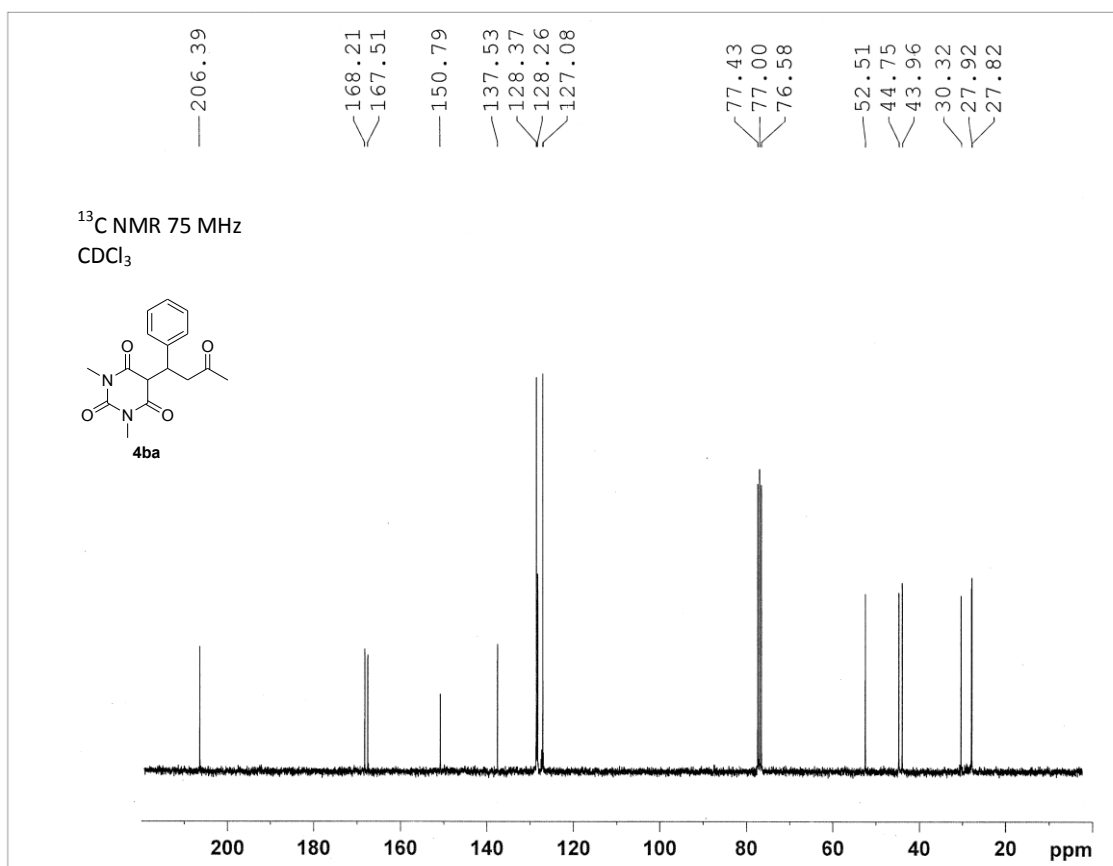

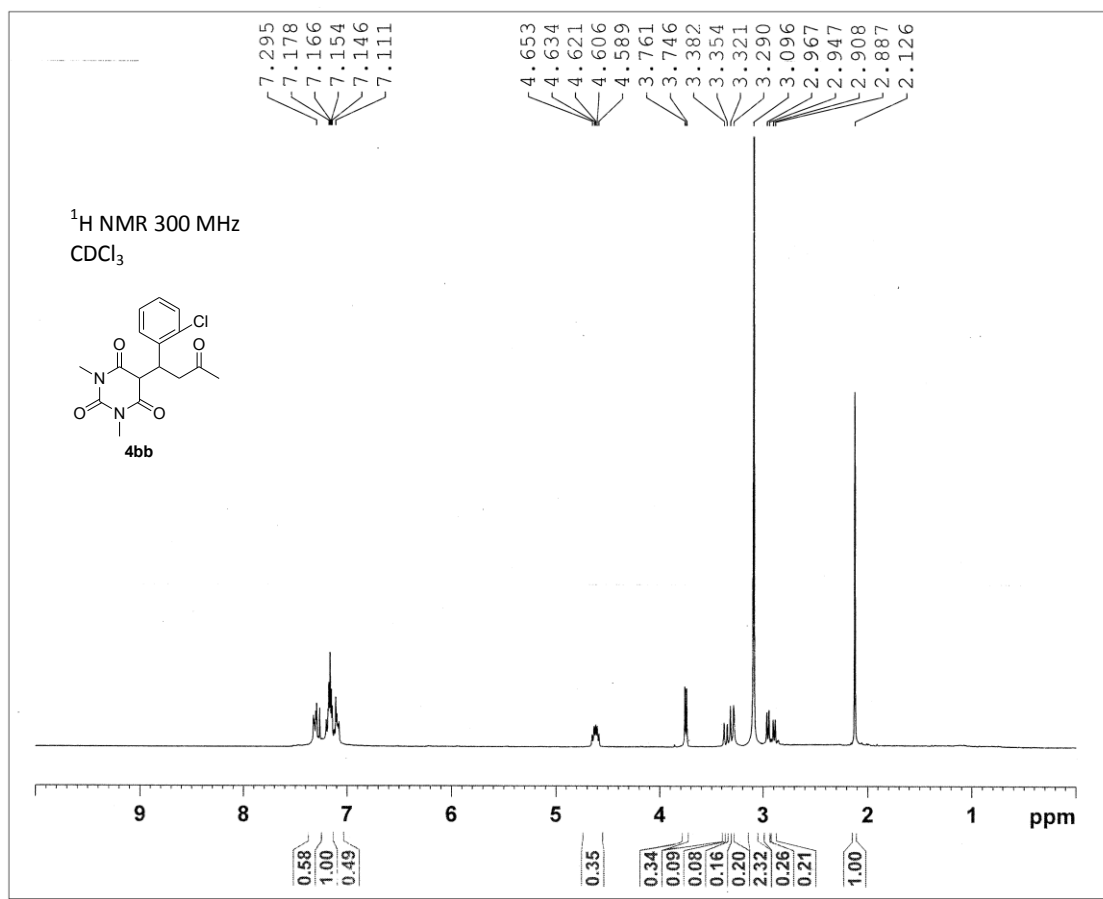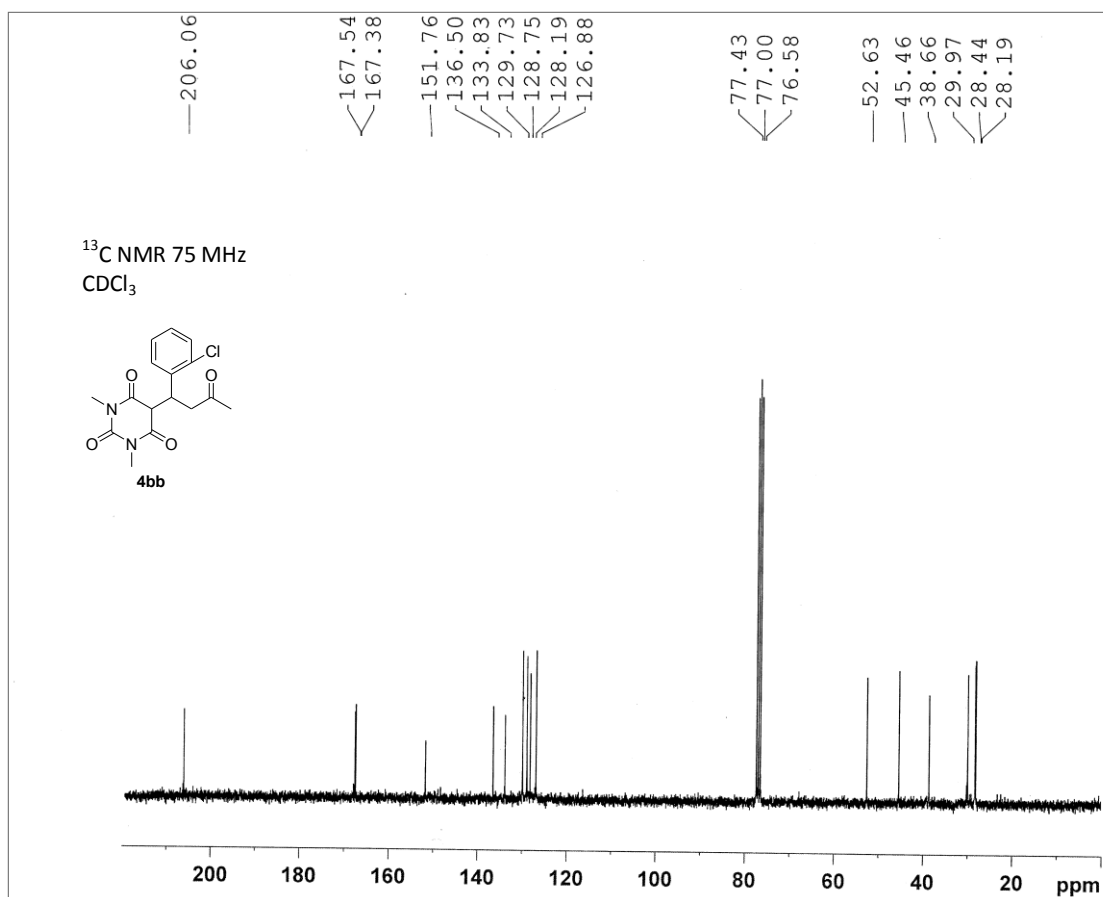

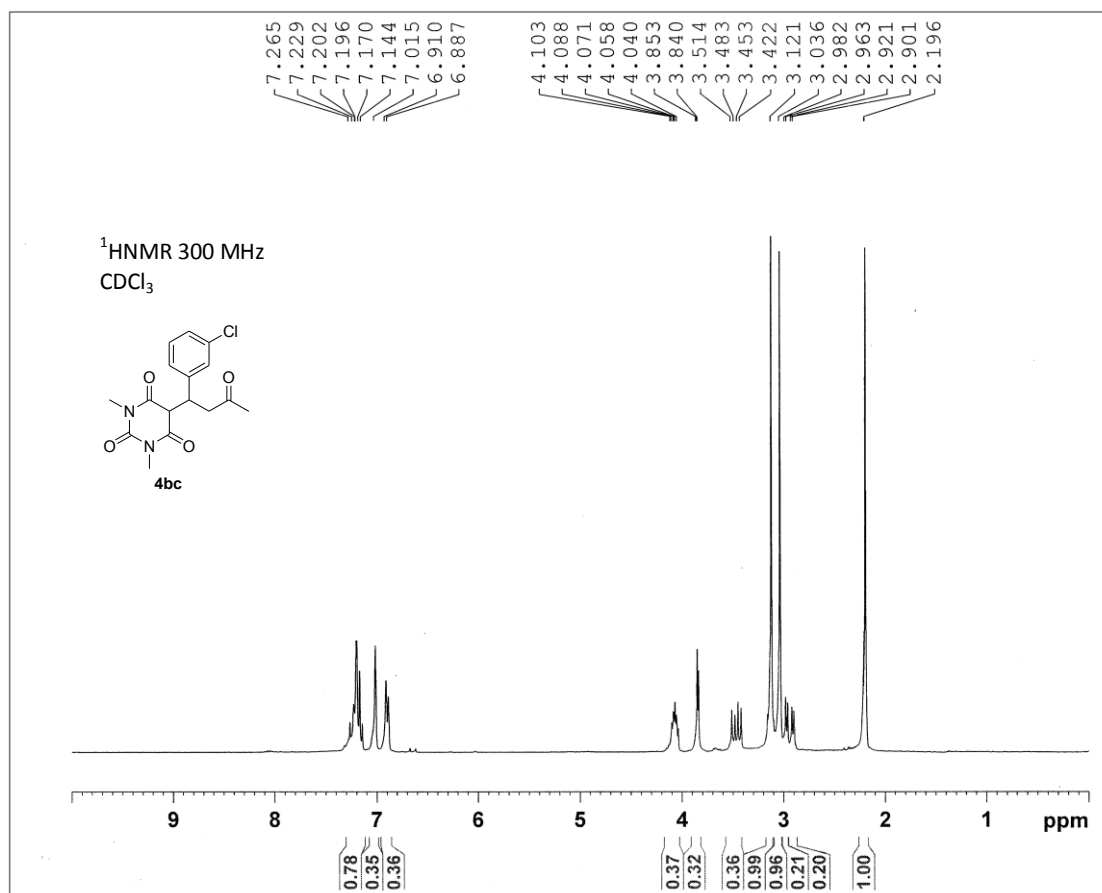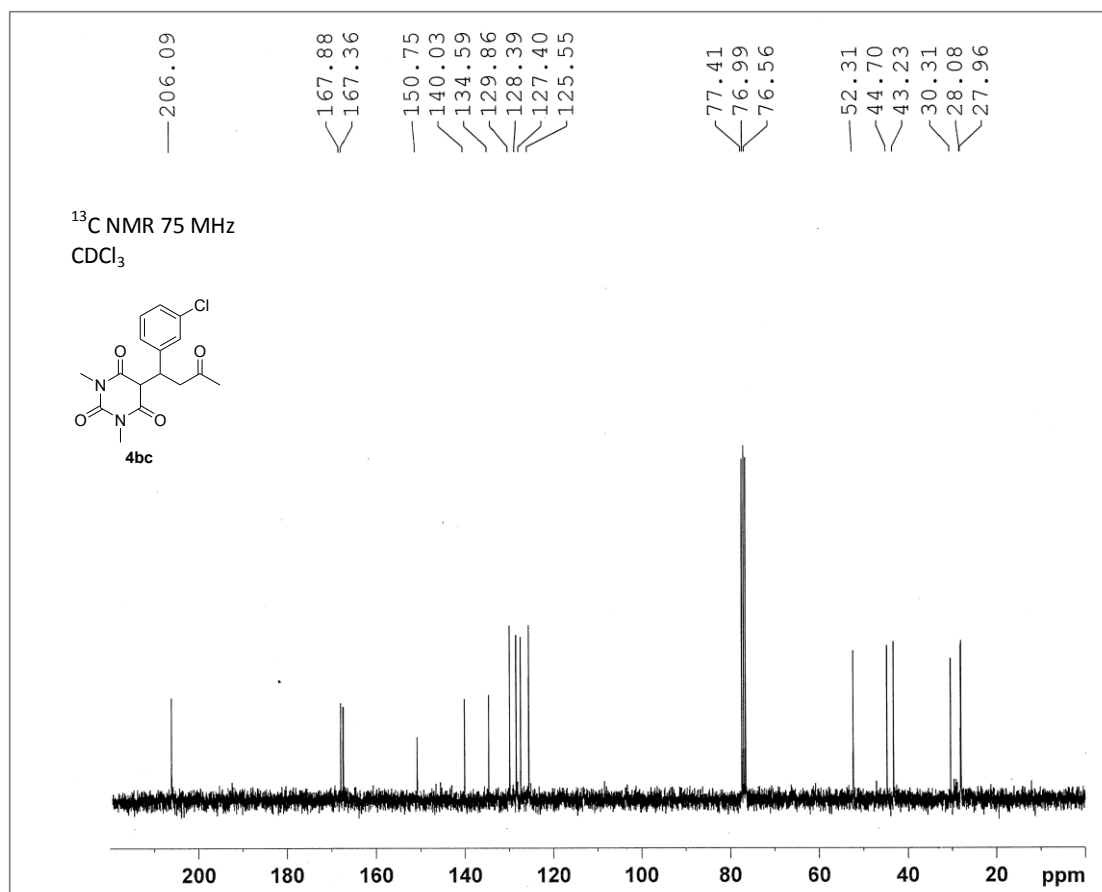



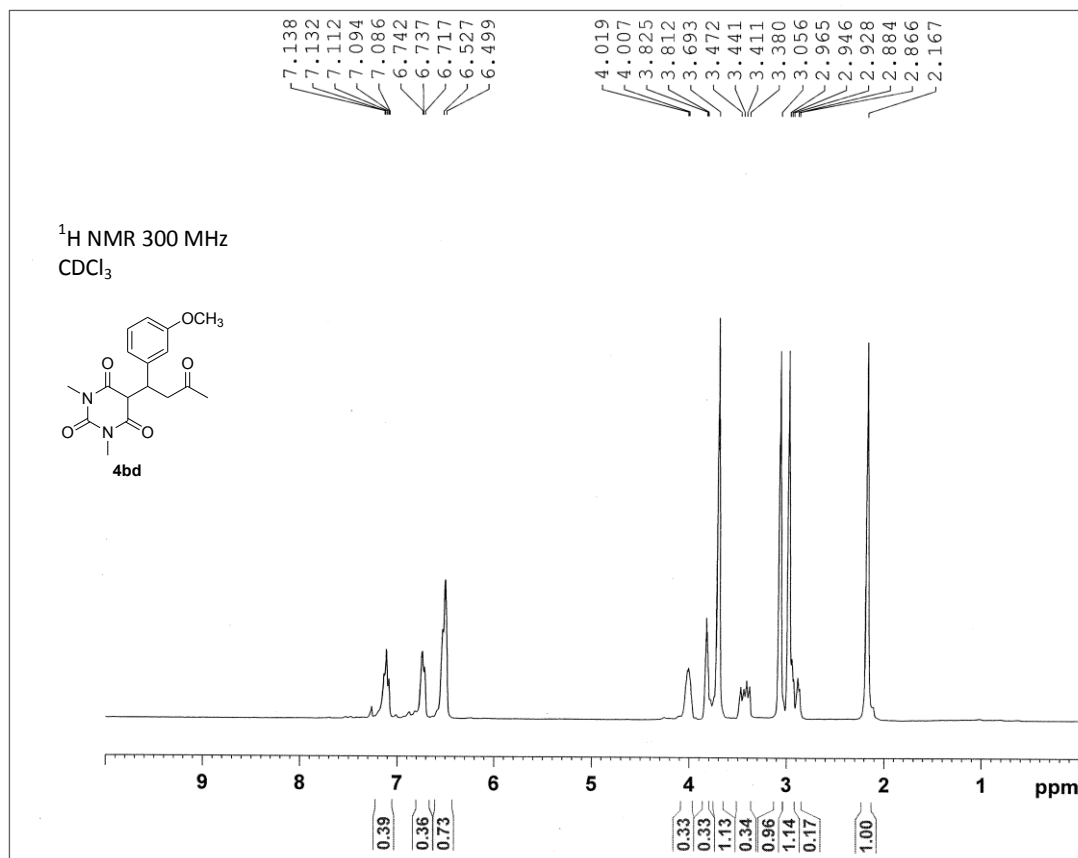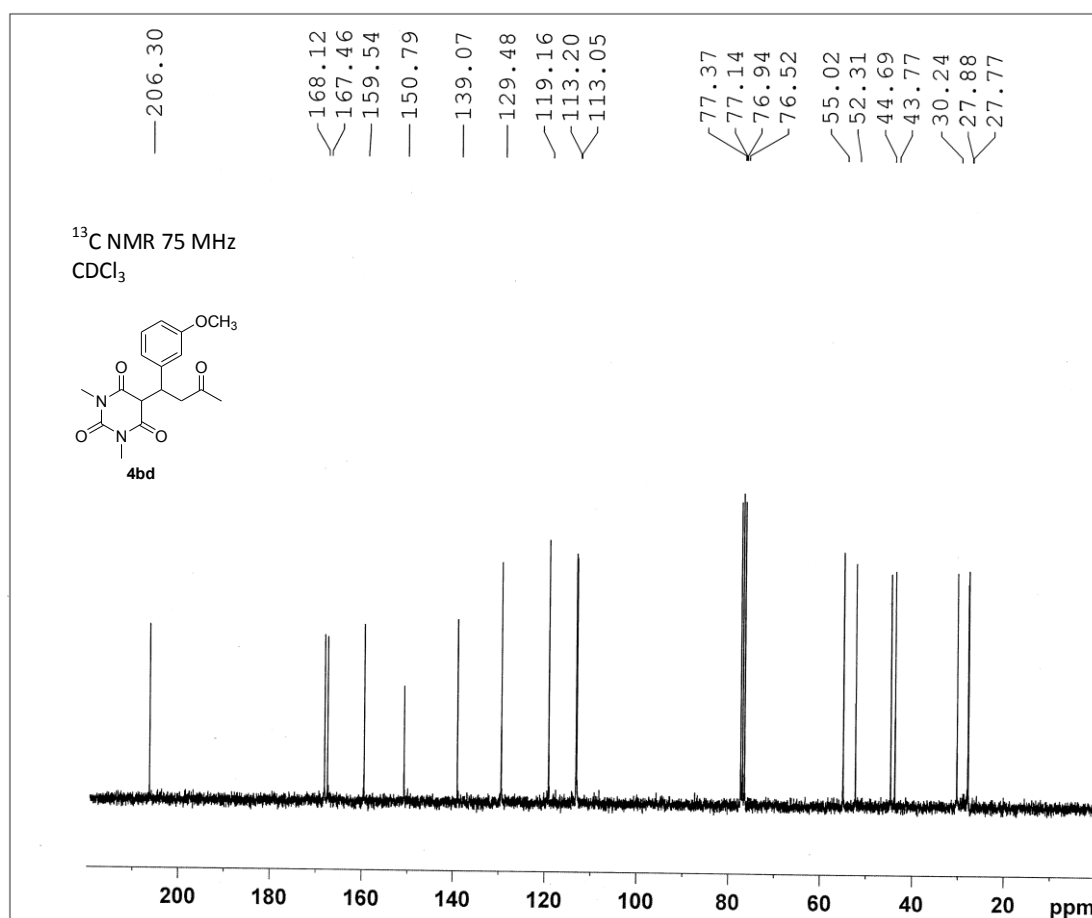

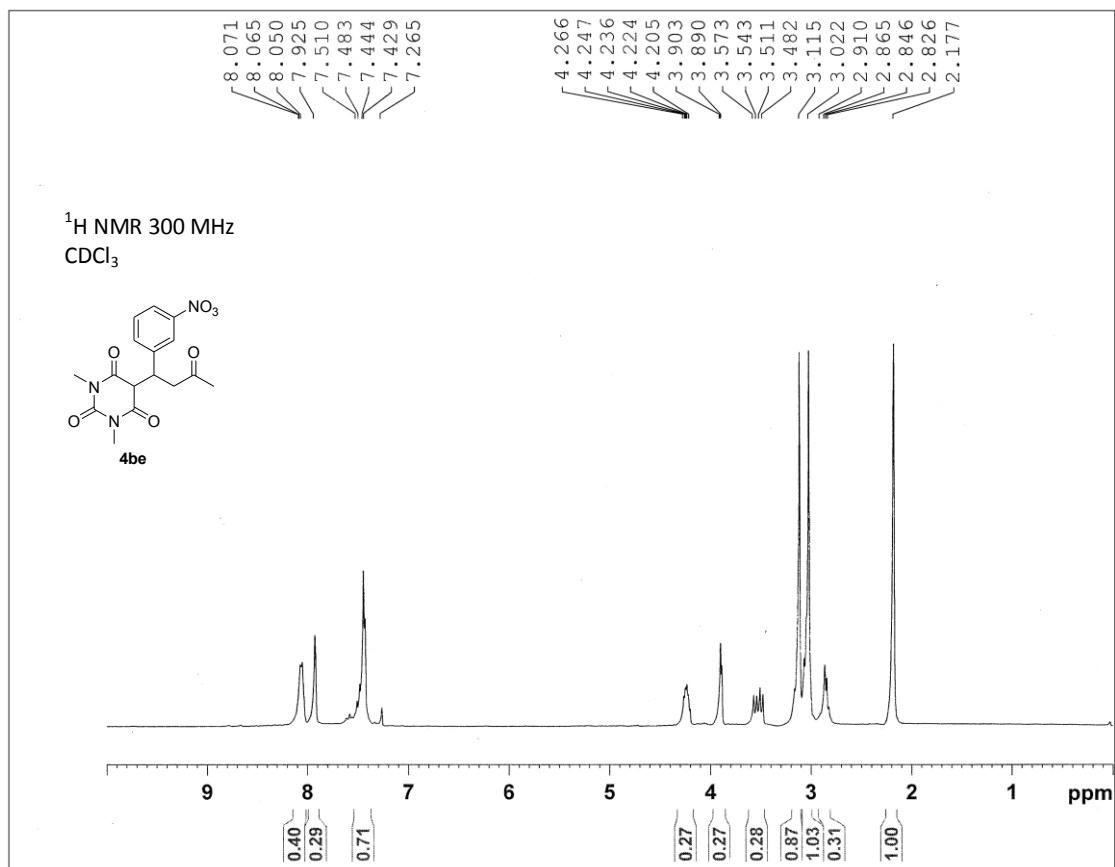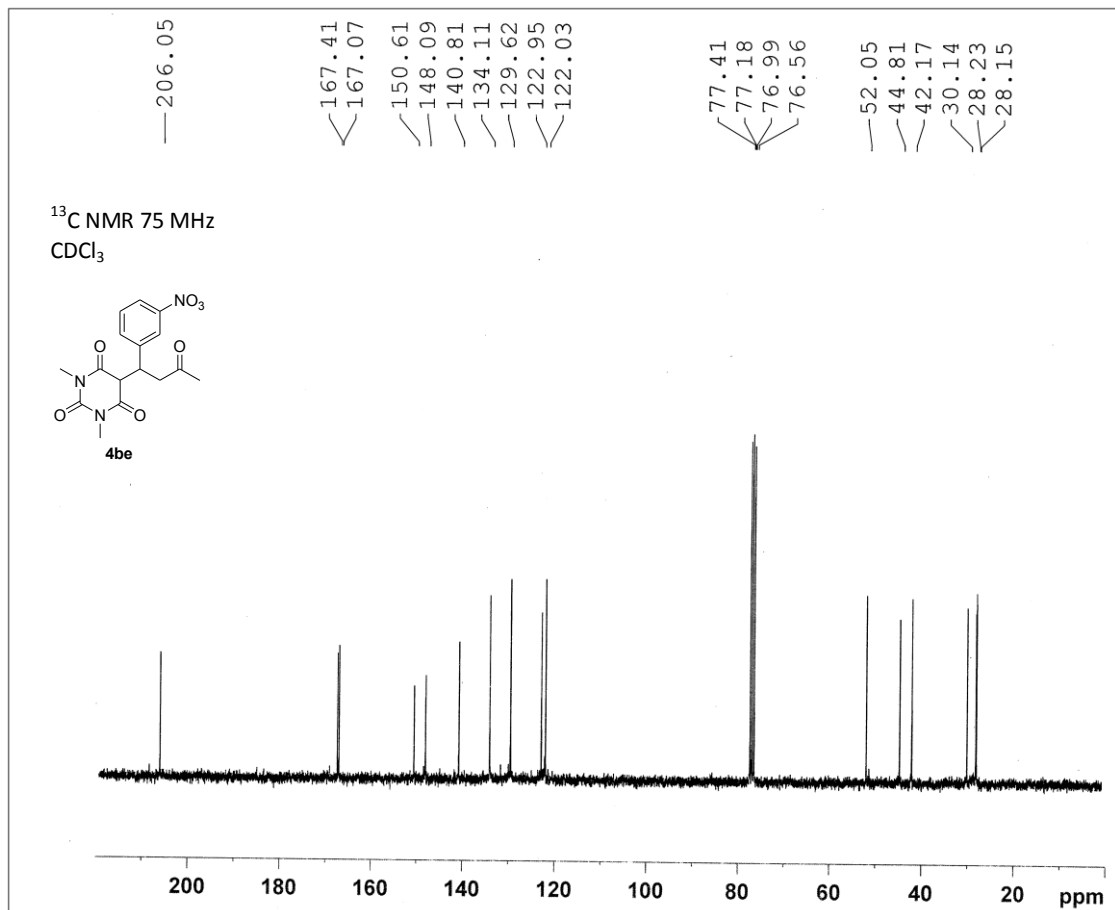

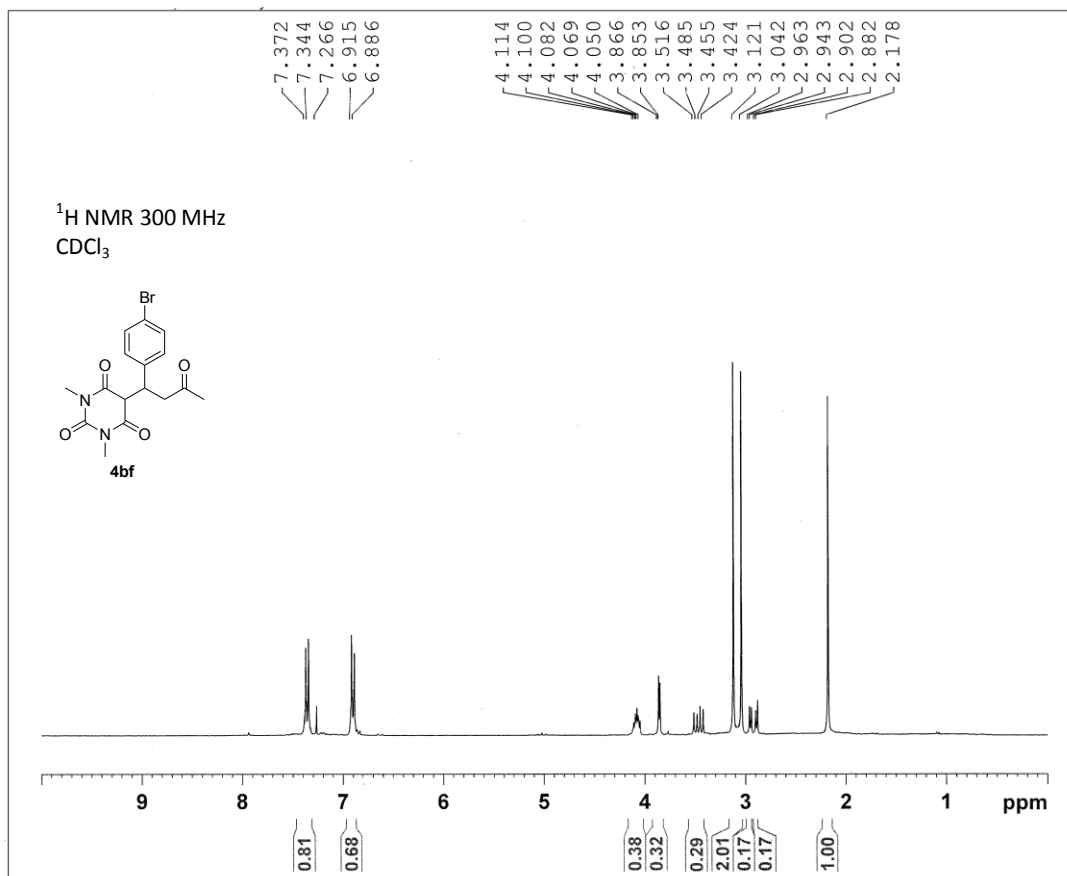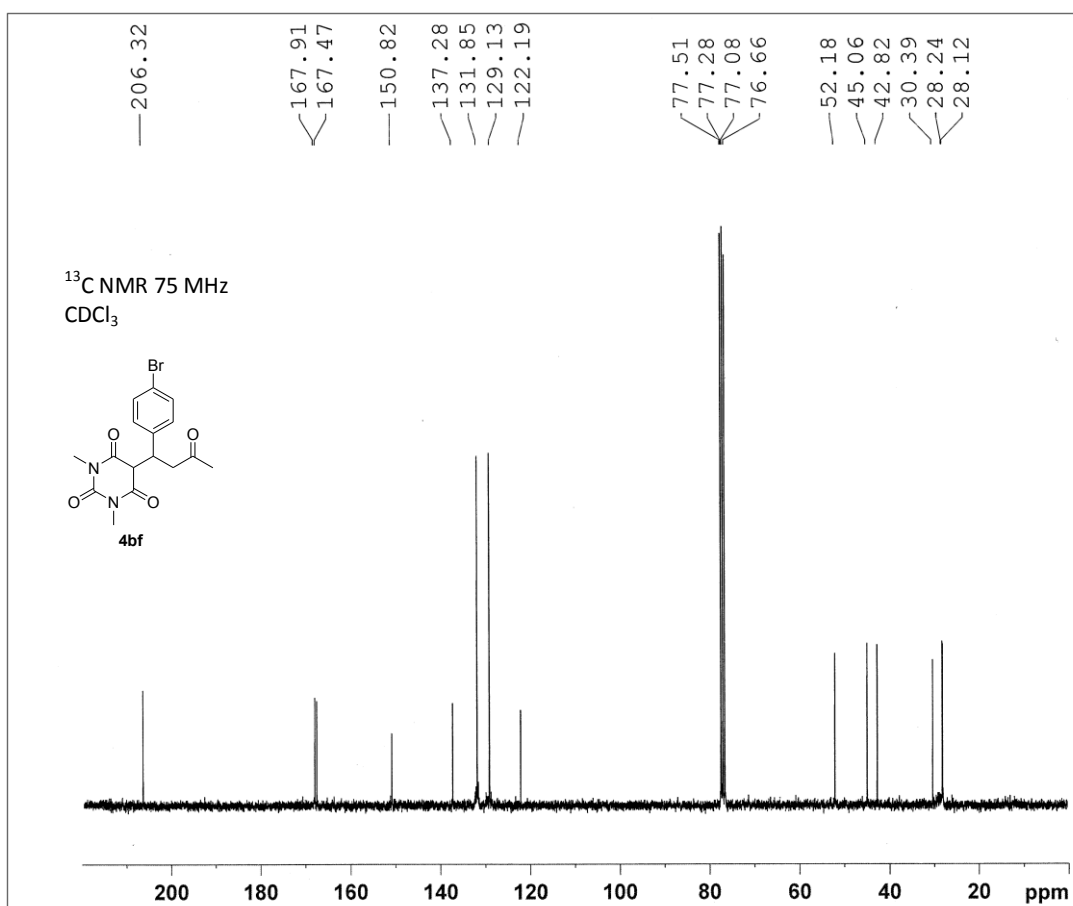

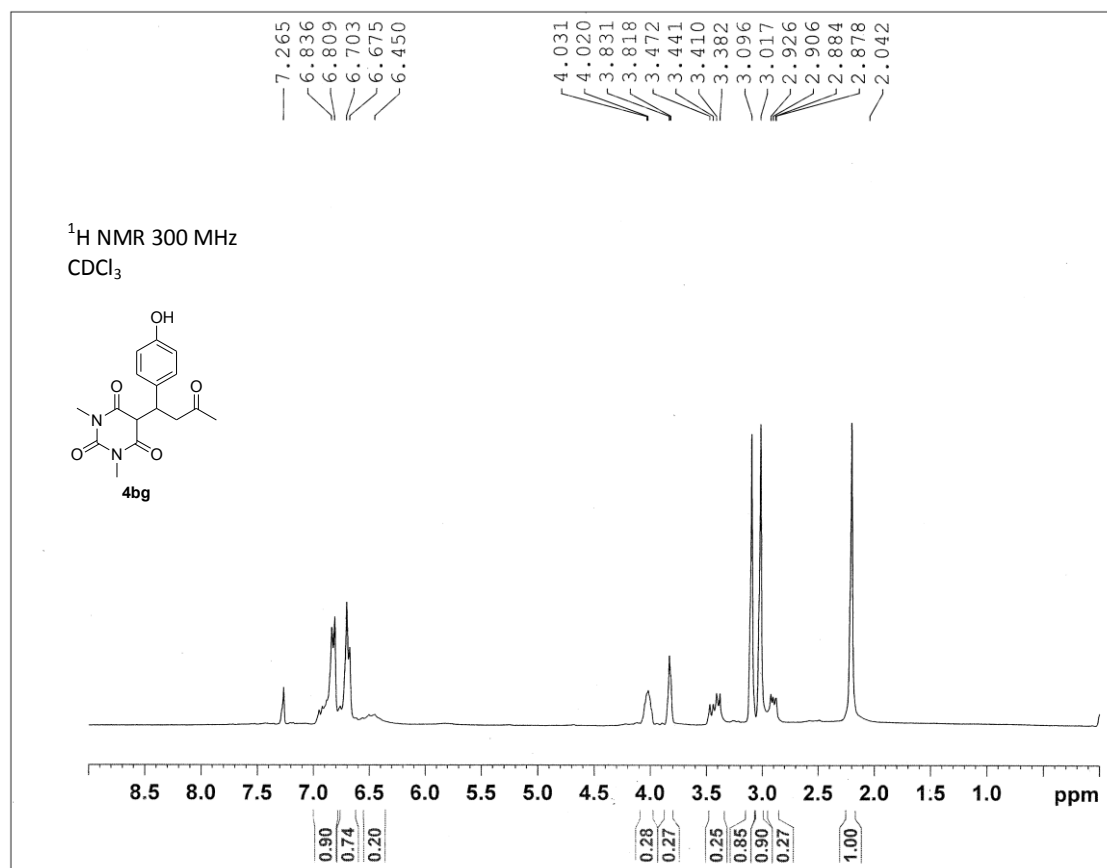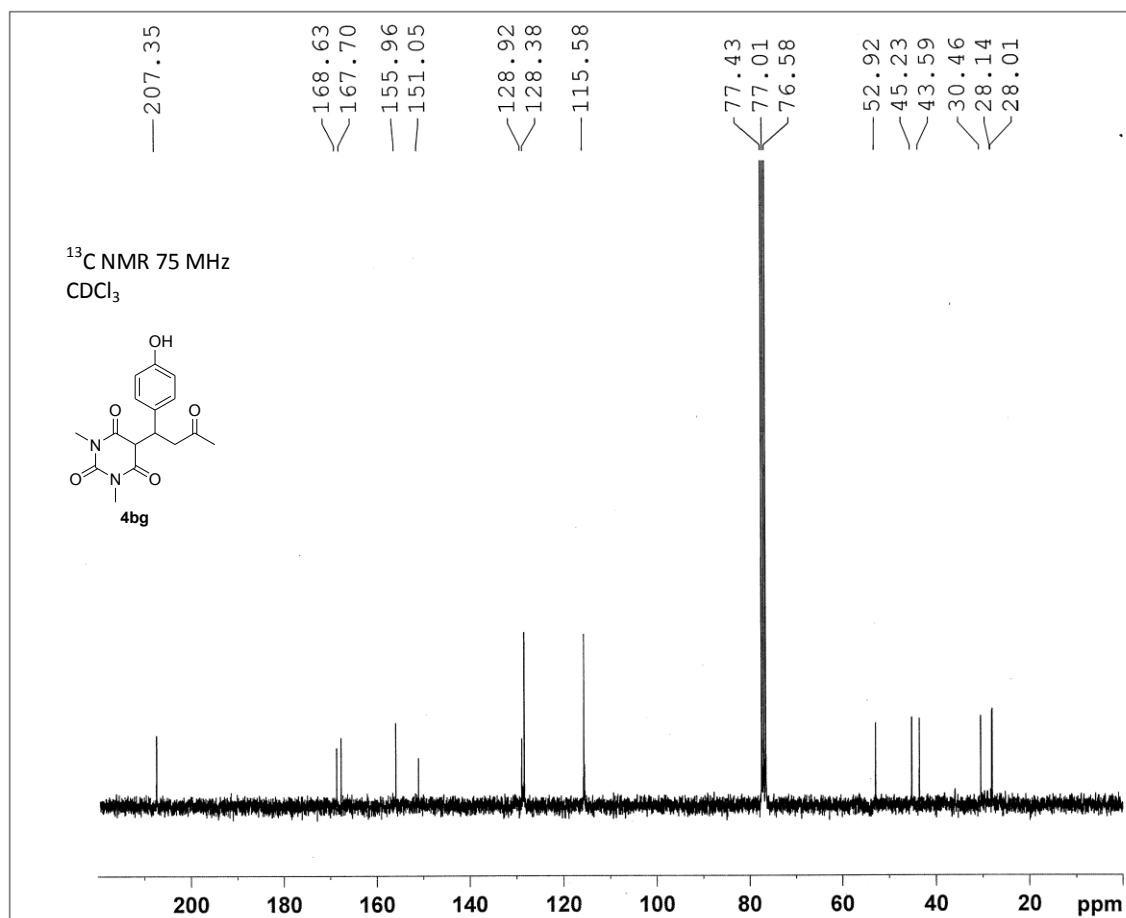

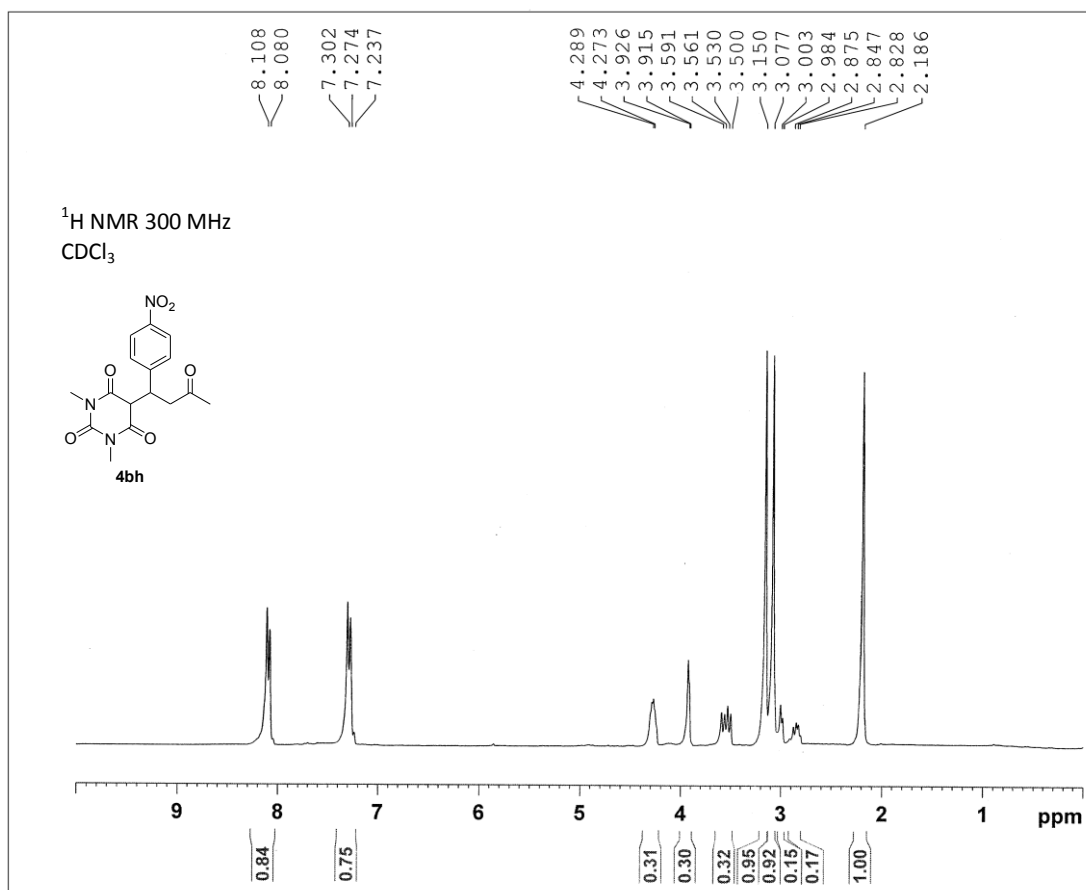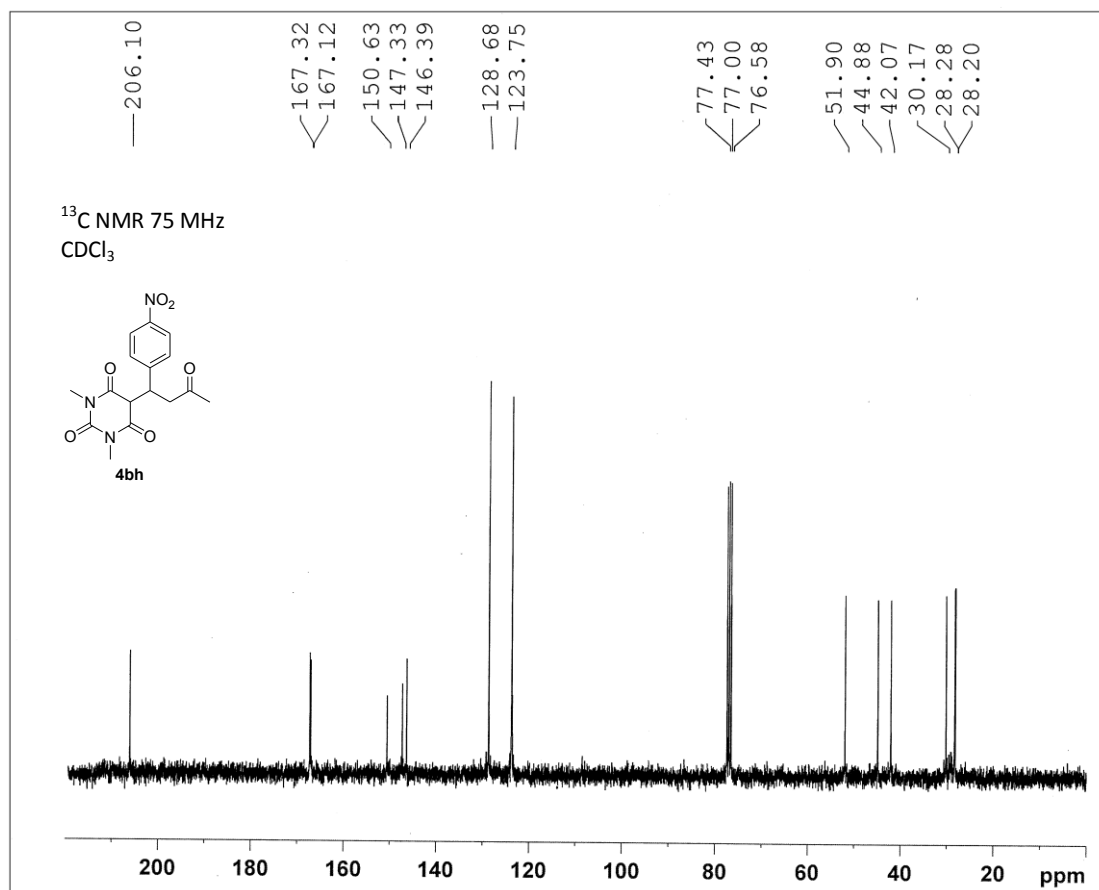

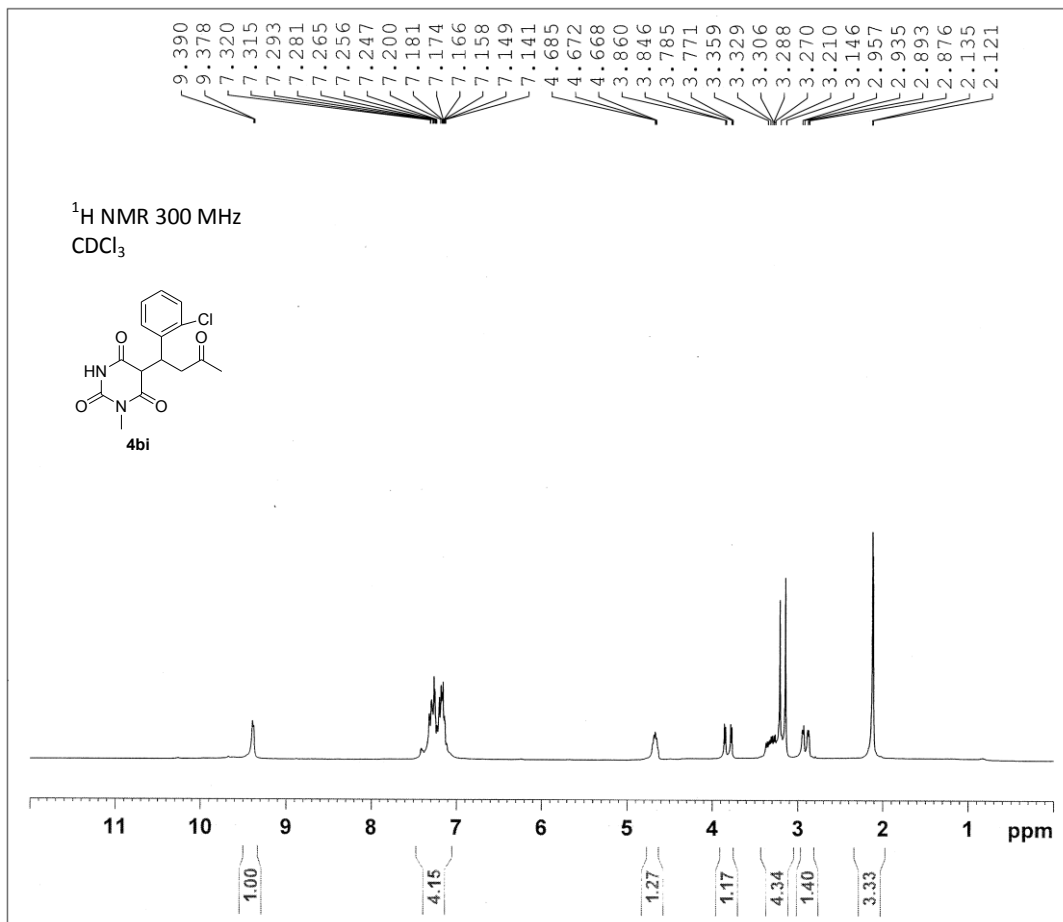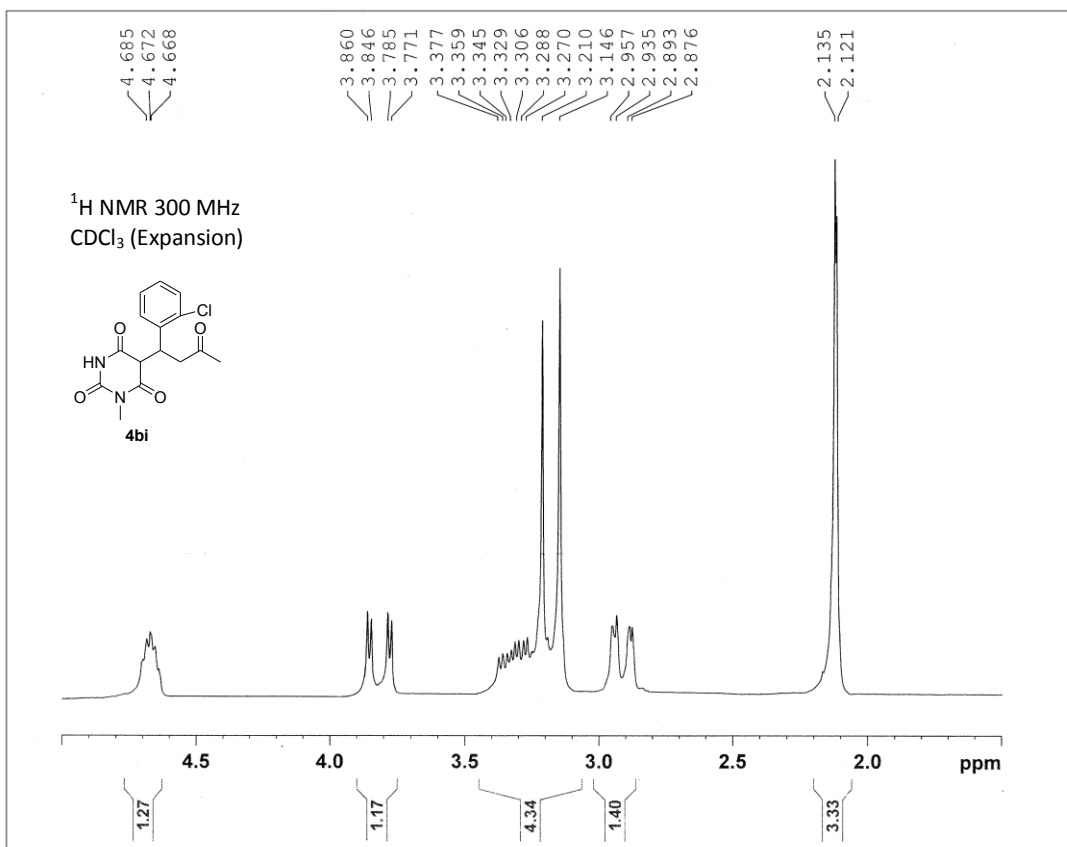

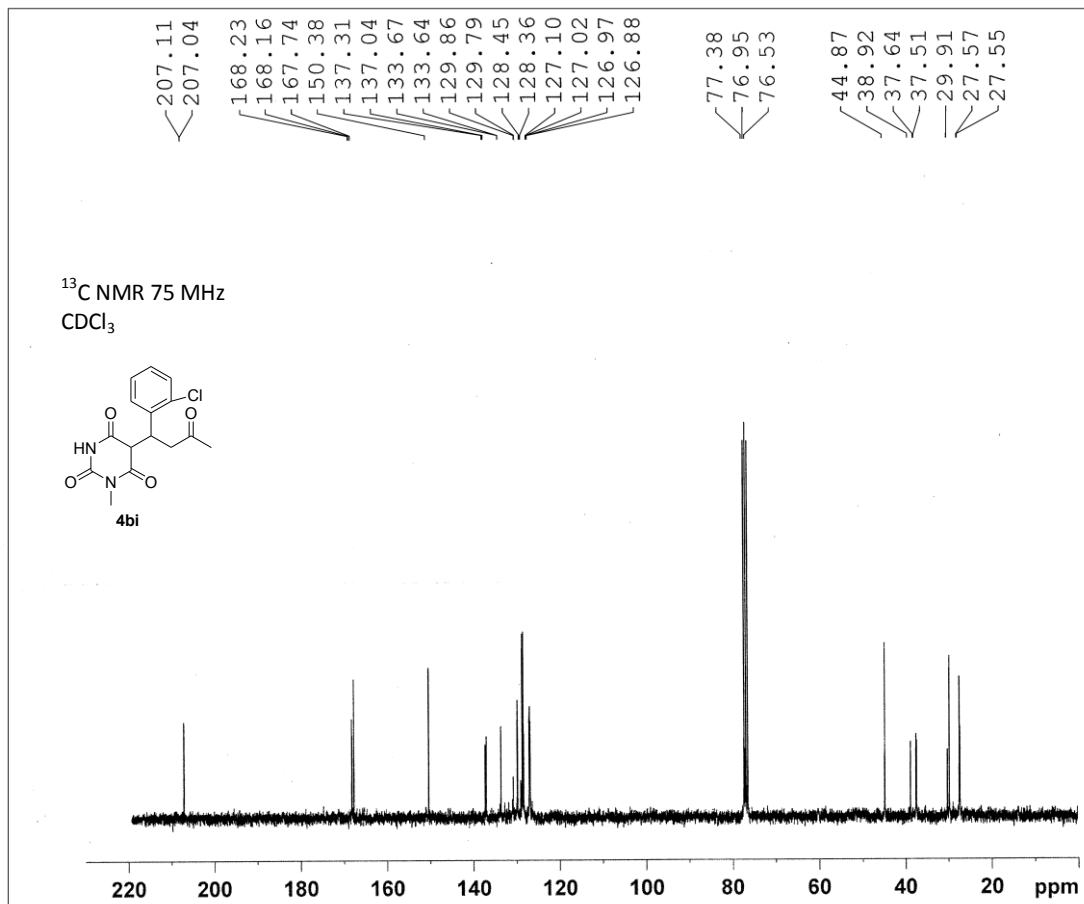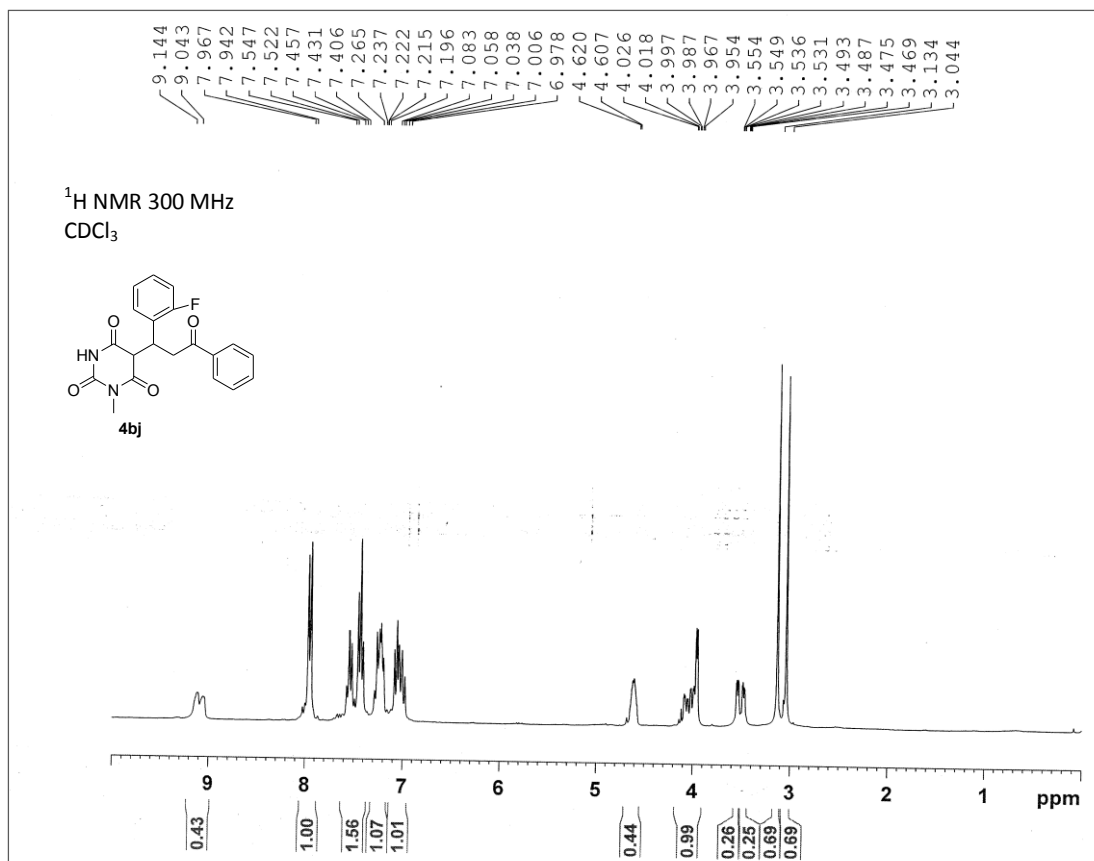

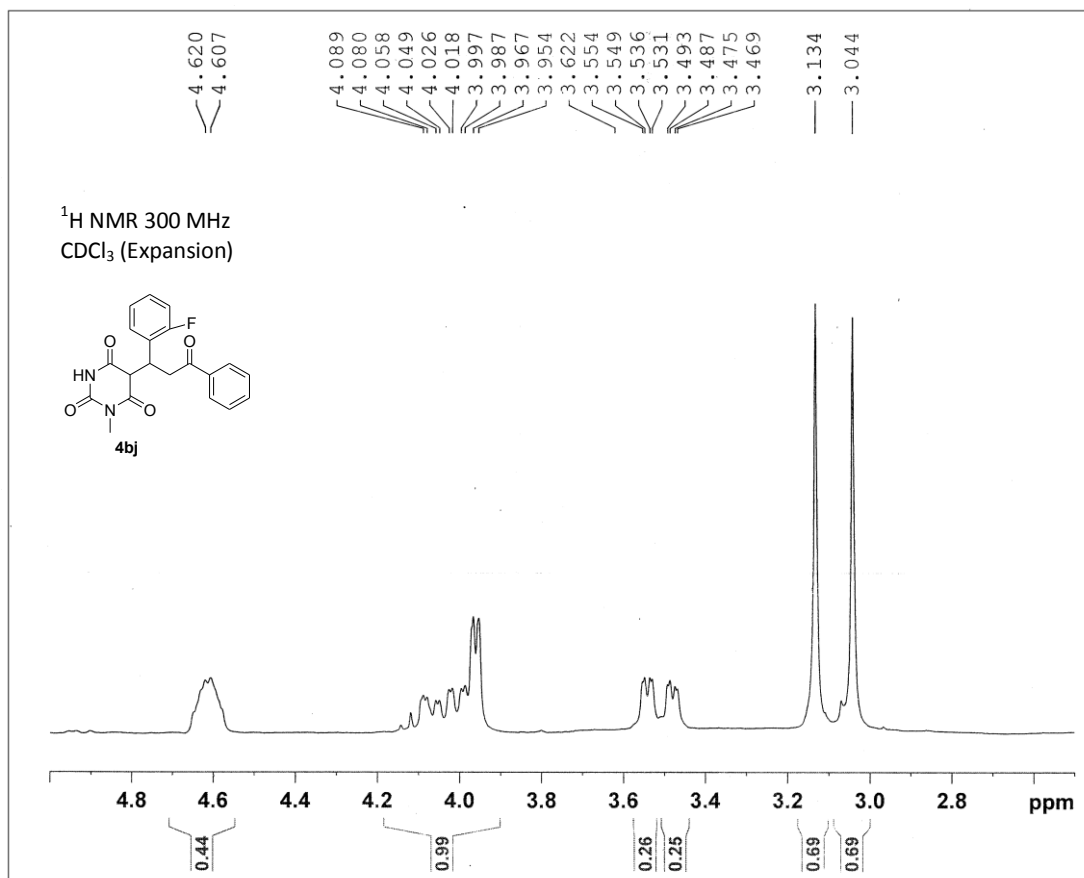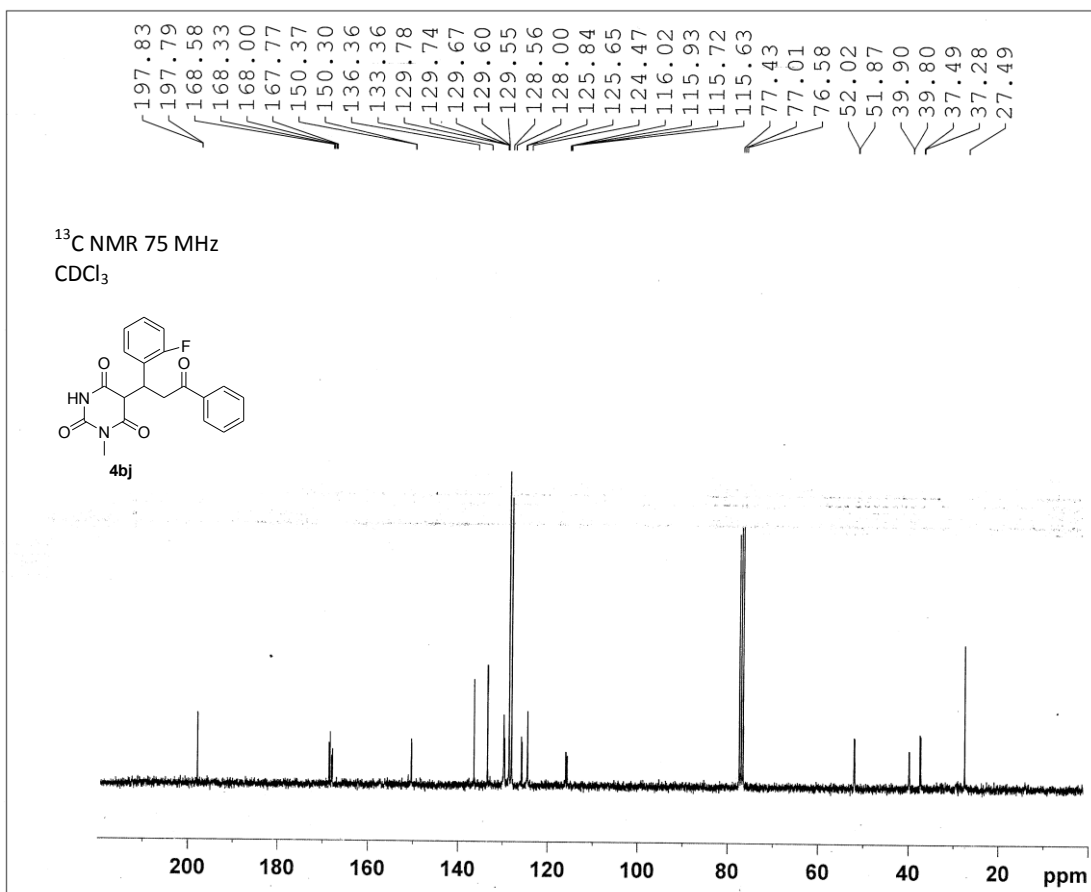



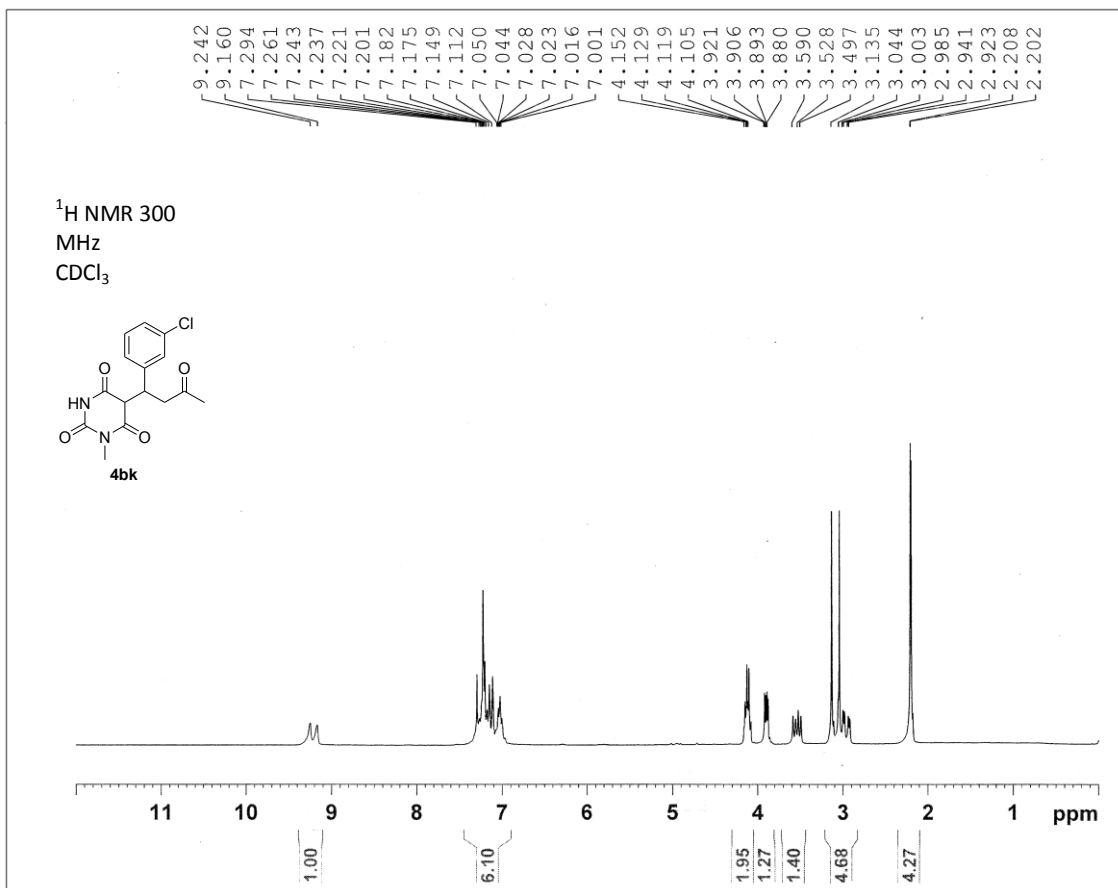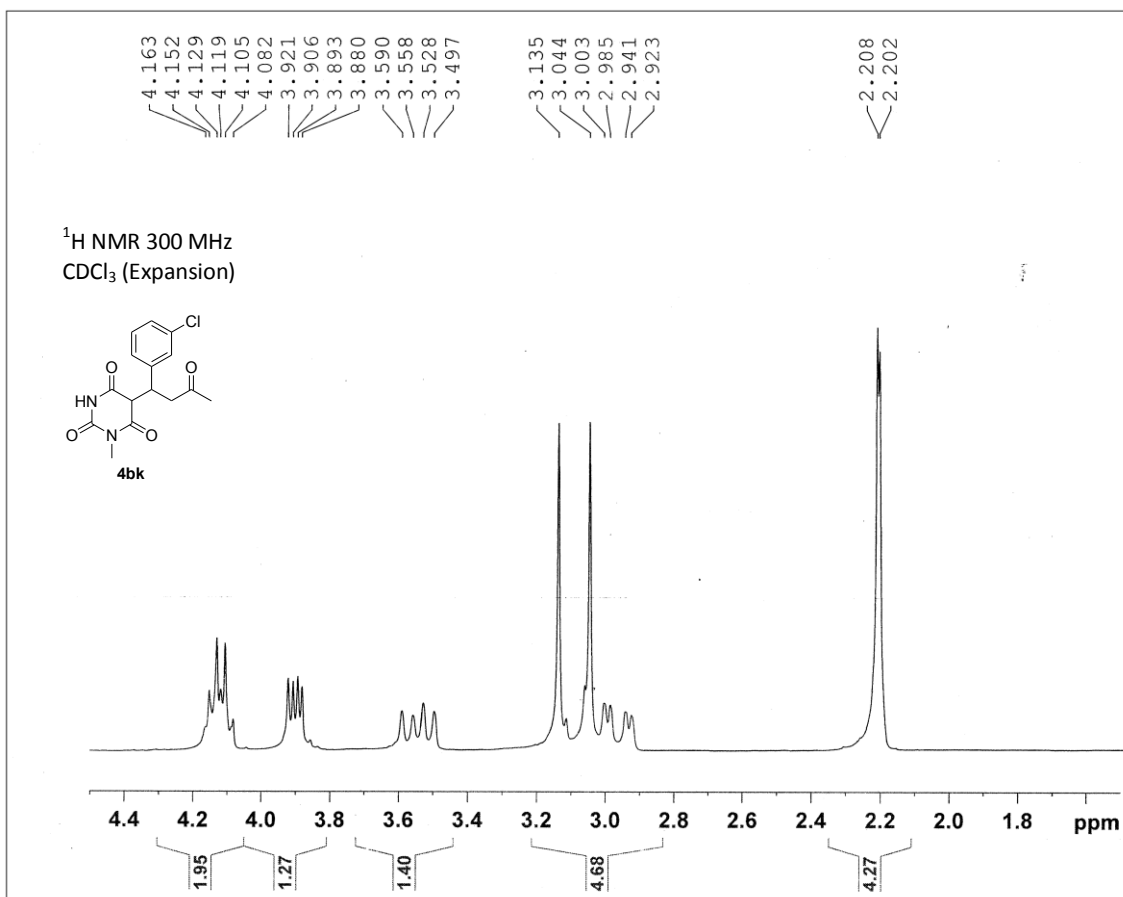

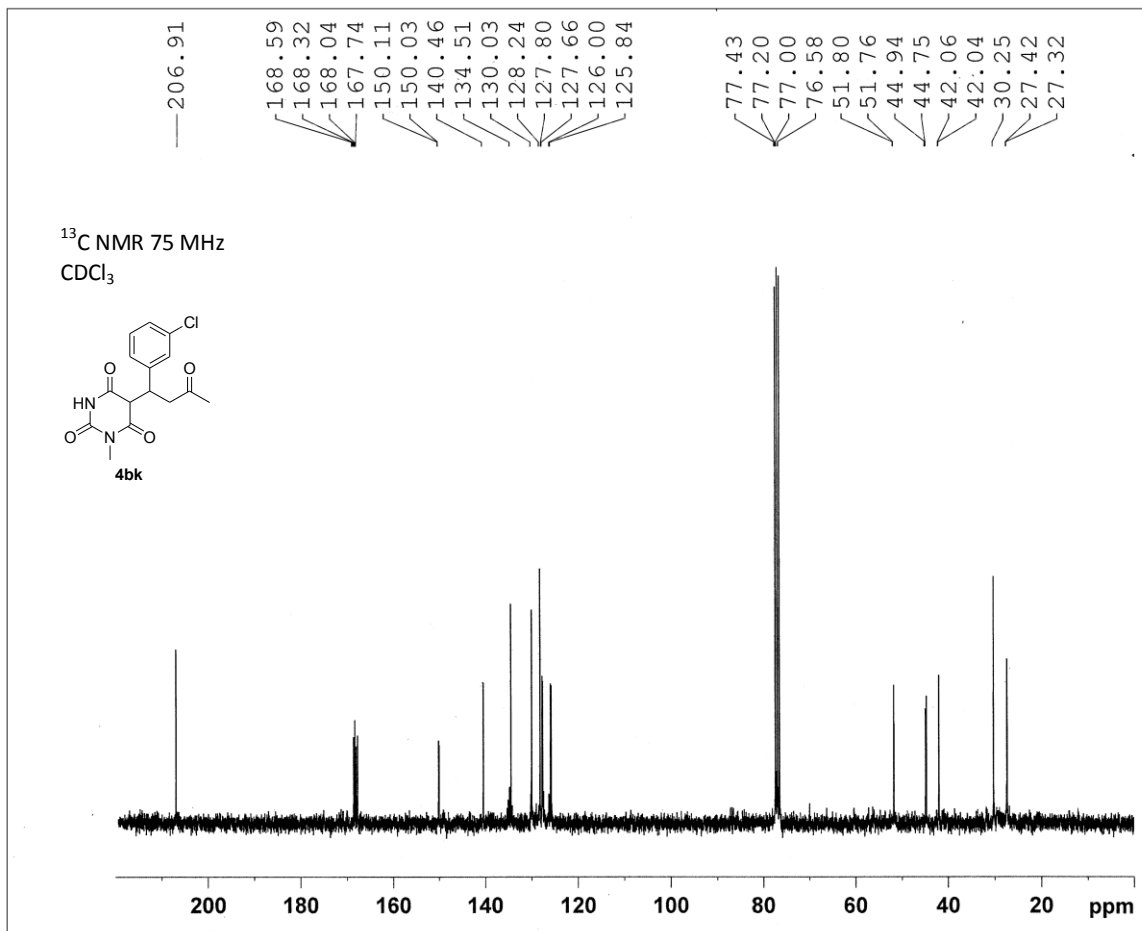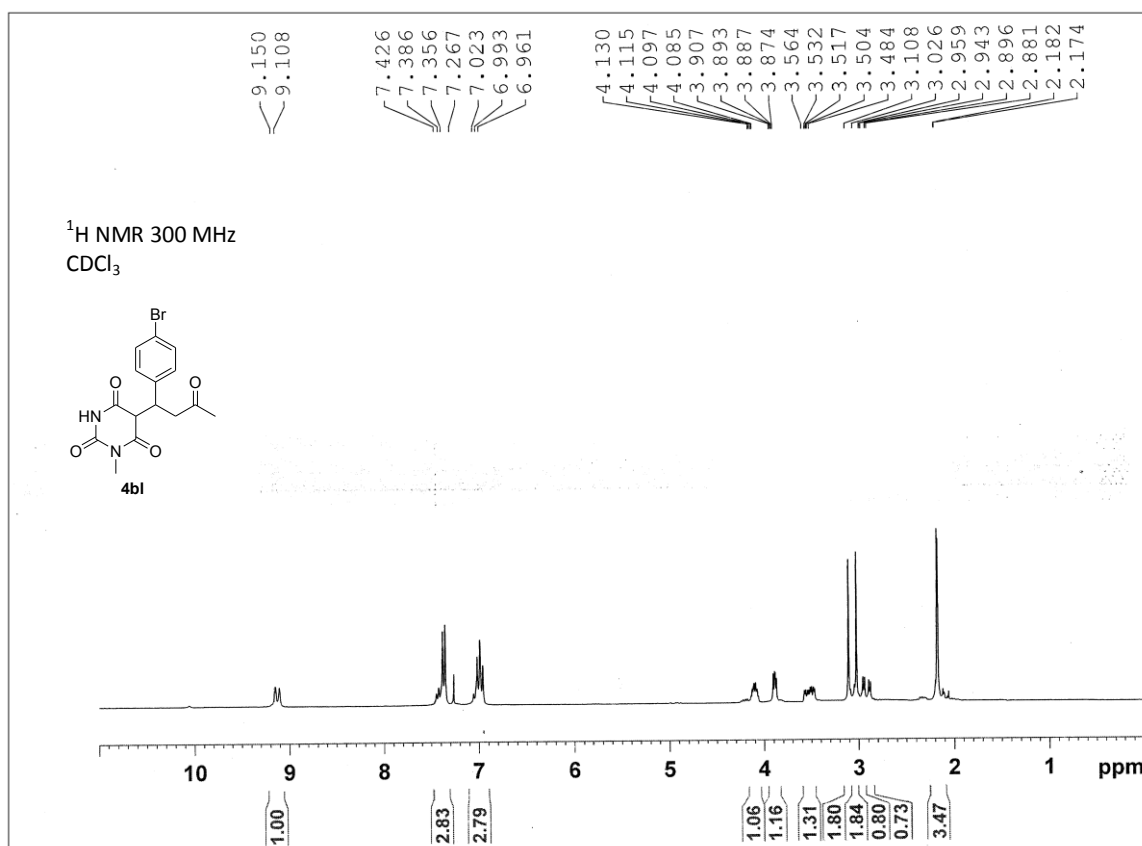

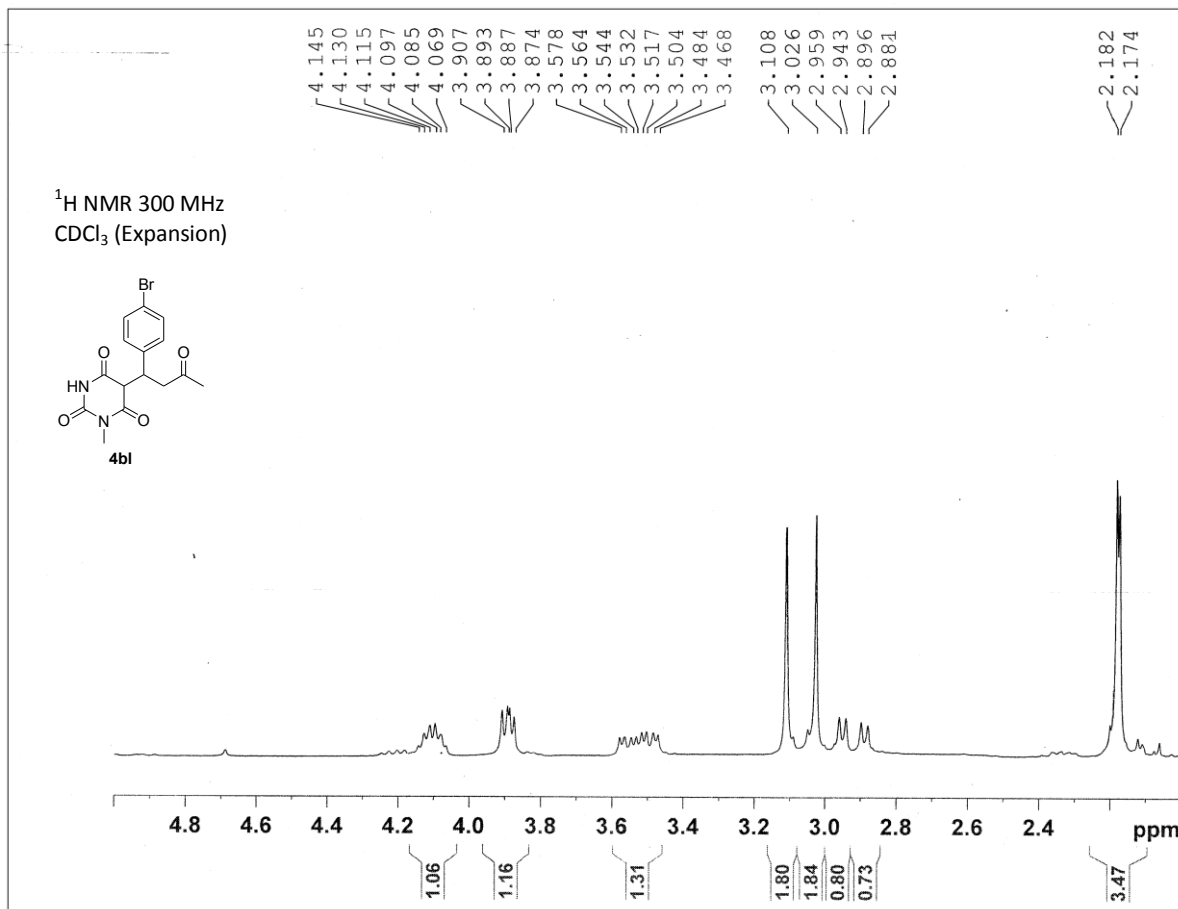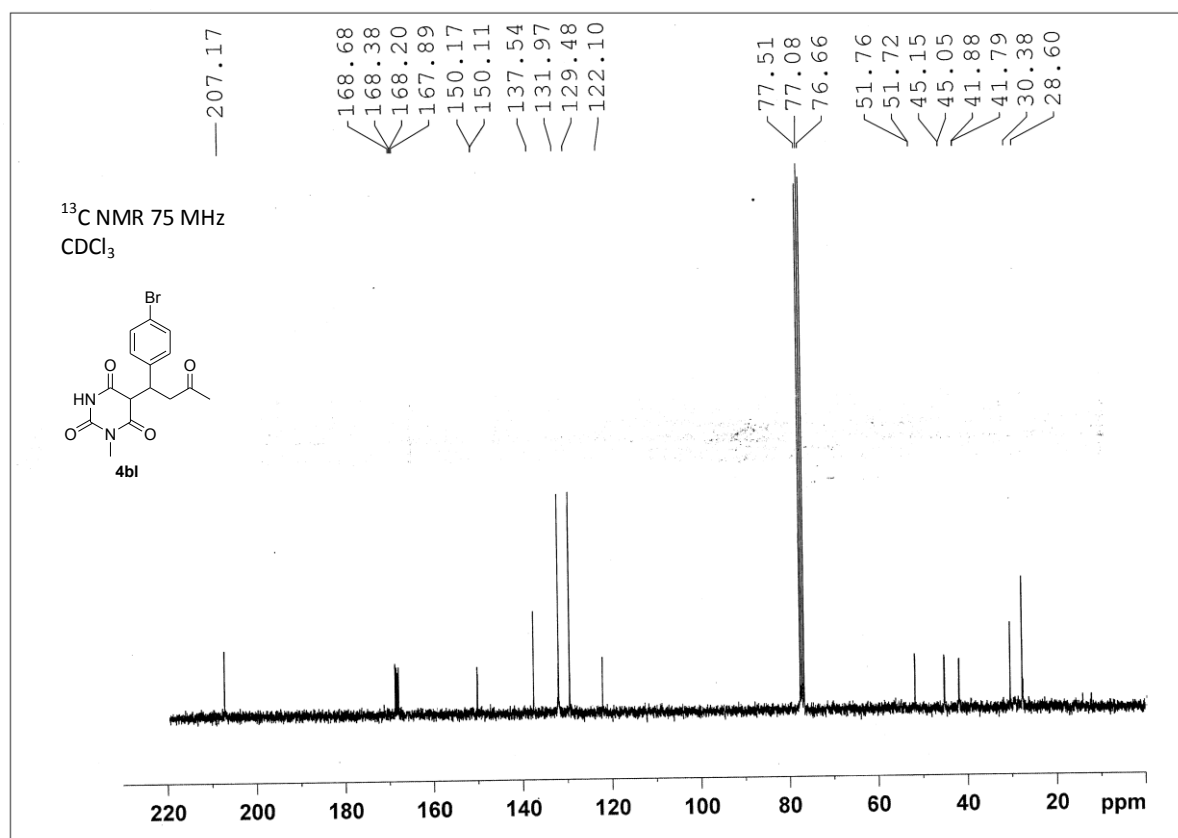

Supplement: c4ra00093e1.pdf [file c4ra00093e1.pdf]
